# Supplementary material for: High PHD Finger Protein 19 (PHF19) expression predicts poor prognosis in colorectal cancer: a retrospective study
Source: PeerJ journal article supplement (doi:10.7717/peerj.11551), 2021-06-01
Supplement: Raw_data.zip [file GSE38832.xlsx]

## Sheet: Sheet1
!Sample_characteristics_ch1	!Sample_characteristics_ch1	!Sample_characteristics_ch1	dss_event (disease specific survival)	dss_time (disease specific survival time, months)	PHF19	PHF19	PHF19_ave
ajcc_stage: 3	dfs_event (disease free survival): 0 (no recurrence)	dfs_time (disease free survival time, months): 111.4	0	111.4	9.67893	10.6857	10.1823
ajcc_stage: 3	dfs_event (disease free survival): 1 (cancer recurrence)	dfs_time (disease free survival time, months): 18.07	0	19.1	9.9985	10.2242	10.1113
ajcc_stage: 3	dfs_event (disease free survival): 0 (no recurrence)	dfs_time (disease free survival time, months): 7.83	0	7.83	9.73402	10.4212	10.0776
ajcc_stage: 4	dfs_event (disease free survival): NA	dfs_time (disease free survival time, months): NA	1	5.2	9.48353	10.2911	9.88729
ajcc_stage: 2	dfs_event (disease free survival): 0 (no recurrence)	dfs_time (disease free survival time, months): 95.03	0	95.03	9.50992	10.1405	9.82523
ajcc_stage: 3	dfs_event (disease free survival): 0 (no recurrence)	dfs_time (disease free survival time, months): 92.2	0	92.2	9.54255	10.0117	9.77714
ajcc_stage: 3	dfs_event (disease free survival): 0 (no recurrence)	dfs_time (disease free survival time, months): 54.17	0	54.17	9.1157	10.357	9.73635
ajcc_stage: 4	dfs_event (disease free survival): NA	dfs_time (disease free survival time, months): NA	1	8.2	9.88724	9.52998	9.70861
ajcc_stage: 4	dfs_event (disease free survival): NA	dfs_time (disease free survival time, months): NA	1	1.57	9.44437	9.84606	9.64521
ajcc_stage: 4	dfs_event (disease free survival): NA	dfs_time (disease free survival time, months): NA	1	40.97	9.27187	9.95742	9.61464
ajcc_stage: 3	dfs_event (disease free survival): 1 (cancer recurrence)	dfs_time (disease free survival time, months): 22.93	0	36.03	8.90337	10.2301	9.56675
ajcc_stage: 1	dfs_event (disease free survival): 0 (no recurrence)	dfs_time (disease free survival time, months): 3.57	0	3.57	9.45377	9.64364	9.54871
ajcc_stage: 2	dfs_event (disease free survival): 0 (no recurrence)	dfs_time (disease free survival time, months): 31.37	0	31.37	9.53054	9.46711	9.49883
ajcc_stage: 1	dfs_event (disease free survival): 0 (no recurrence)	dfs_time (disease free survival time, months): 14.63	0	14.63	8.81964	10.16	9.4898
ajcc_stage: 2	dfs_event (disease free survival): 0 (no recurrence)	dfs_time (disease free survival time, months): 20.33	0	20.33	8.51858	10.4403	9.47944
ajcc_stage: 4	dfs_event (disease free survival): NA	dfs_time (disease free survival time, months): NA	1	17.6	9.36565	9.59142	9.47853
ajcc_stage: 2	dfs_event (disease free survival): 0 (no recurrence)	dfs_time (disease free survival time, months): 106.47	0	106.47	9.11514	9.8079	9.46152
ajcc_stage: 3	dfs_event (disease free survival): 0 (no recurrence)	dfs_time (disease free survival time, months): 92.47	0	92.47	9.33763	9.57231	9.45497
ajcc_stage: 2	dfs_event (disease free survival): 0 (no recurrence)	dfs_time (disease free survival time, months): 33.07	0	33.07	9.44509	9.43229	9.43869
ajcc_stage: 4	dfs_event (disease free survival): NA	dfs_time (disease free survival time, months): NA	1	6.4	9.80774	9.05666	9.4322
ajcc_stage: 4	dfs_event (disease free survival): NA	dfs_time (disease free survival time, months): NA	1	8.53	9.21267	9.60672	9.40969
ajcc_stage: 2	dfs_event (disease free survival): 0 (no recurrence)	dfs_time (disease free survival time, months): 20.83	0	20.83	9.46243	9.30686	9.38464
ajcc_stage: 2	dfs_event (disease free survival): 0 (no recurrence)	dfs_time (disease free survival time, months): 81.1	0	81.1	9.02032	9.70381	9.36206
ajcc_stage: 3	dfs_event (disease free survival): 0 (no recurrence)	dfs_time (disease free survival time, months): 52.07	0	52.07	8.32115	10.3817	9.35144
ajcc_stage: 4	dfs_event (disease free survival): NA	dfs_time (disease free survival time, months): NA	0	1.17	8.86669	9.74862	9.30765
ajcc_stage: 3	dfs_event (disease free survival): 1 (cancer recurrence)	dfs_time (disease free survival time, months): 9.73	0	26.8	9.11864	9.49451	9.30657
ajcc_stage: 2	dfs_event (disease free survival): 0 (no recurrence)	dfs_time (disease free survival time, months): 63.53	0	63.53	9.39233	9.16977	9.28105
ajcc_stage: 4	dfs_event (disease free survival): NA	dfs_time (disease free survival time, months): NA	1	1.1	8.83975	9.71002	9.27489
ajcc_stage: 3	dfs_event (disease free survival): 0 (no recurrence)	dfs_time (disease free survival time, months): 54.7	0	54.7	9.81276	8.68426	9.24851
ajcc_stage: 3	dfs_event (disease free survival): 0 (no recurrence)	dfs_time (disease free survival time, months): 105.6	0	105.6	9.17794	9.31285	9.24539
ajcc_stage: 3	dfs_event (disease free survival): 0 (no recurrence)	dfs_time (disease free survival time, months): 0.3	0	0.3	8.65117	9.82756	9.23937
ajcc_stage: 3	dfs_event (disease free survival): 1 (cancer recurrence)	dfs_time (disease free survival time, months): 60	1	69.17	9.51621	8.94969	9.23295
ajcc_stage: 1	dfs_event (disease free survival): 0 (no recurrence)	dfs_time (disease free survival time, months): 59.03	0	59.03	8.86658	9.59886	9.23272
ajcc_stage: 3	dfs_event (disease free survival): 0 (no recurrence)	dfs_time (disease free survival time, months): 7.37	0	7.37	9.09476	9.36311	9.22894
ajcc_stage: 4	dfs_event (disease free survival): NA	dfs_time (disease free survival time, months): NA	1	23.4	8.79984	9.65707	9.22845
ajcc_stage: 2	dfs_event (disease free survival): 0 (no recurrence)	dfs_time (disease free survival time, months): 89.17	0	89.17	8.43261	10.0223	9.22743
ajcc_stage: 4	dfs_event (disease free survival): NA	dfs_time (disease free survival time, months): NA	1	30.8	8.80207	9.64024	9.22116
ajcc_stage: 2	dfs_event (disease free survival): 0 (no recurrence)	dfs_time (disease free survival time, months): 12.17	0	12.17	8.46526	9.9756	9.22043
ajcc_stage: 2	dfs_event (disease free survival): 0 (no recurrence)	dfs_time (disease free survival time, months): 56.4	0	56.4	8.99009	9.38485	9.18747
ajcc_stage: 3	dfs_event (disease free survival): 0 (no recurrence)	dfs_time (disease free survival time, months): 43.83	0	43.83	8.44761	9.89382	9.17072
ajcc_stage: 4	dfs_event (disease free survival): NA	dfs_time (disease free survival time, months): NA	1	0.97	8.53485	9.80317	9.16901
ajcc_stage: 3	dfs_event (disease free survival): 0 (no recurrence)	dfs_time (disease free survival time, months): 91.8	0	91.8	9.08136	9.23059	9.15597
ajcc_stage: 4	dfs_event (disease free survival): NA	dfs_time (disease free survival time, months): NA	1	32.53	8.84454	9.43916	9.14185
ajcc_stage: 4	dfs_event (disease free survival): NA	dfs_time (disease free survival time, months): NA	1	9.47	8.37856	9.89454	9.13655
ajcc_stage: 4	dfs_event (disease free survival): NA	dfs_time (disease free survival time, months): NA	0	19.37	9.26519	8.96804	9.11662
ajcc_stage: 2	dfs_event (disease free survival): 1 (cancer recurrence)	dfs_time (disease free survival time, months): 14.6	0	21.17	9.02333	9.19264	9.10799
ajcc_stage: 2	dfs_event (disease free survival): 0 (no recurrence)	dfs_time (disease free survival time, months): 27.6	0	27.6	9.13503	9.06914	9.10208
ajcc_stage: 3	dfs_event (disease free survival): 0 (no recurrence)	dfs_time (disease free survival time, months): 108.73	0	108.73	8.97475	9.22504	9.09989
ajcc_stage: 3	dfs_event (disease free survival): 0 (no recurrence)	dfs_time (disease free survival time, months): 50.17	0	50.17	8.698	9.49001	9.094
ajcc_stage: 2	dfs_event (disease free survival): 0 (no recurrence)	dfs_time (disease free survival time, months): 4.33	0	4.33	9.29248	8.86596	9.07922
ajcc_stage: 3	dfs_event (disease free survival): 0 (no recurrence)	dfs_time (disease free survival time, months): 22.83	0	22.83	8.48781	9.66632	9.07706
ajcc_stage: 2	dfs_event (disease free survival): 0 (no recurrence)	dfs_time (disease free survival time, months): 24.83	0	24.83	8.82218	9.27494	9.04856
ajcc_stage: 4	dfs_event (disease free survival): NA	dfs_time (disease free survival time, months): NA	1	12.83	9.30879	8.78487	9.04683
ajcc_stage: 2	dfs_event (disease free survival): 0 (no recurrence)	dfs_time (disease free survival time, months): 80.37	0	80.37	8.41394	9.67649	9.04522
ajcc_stage: 3	dfs_event (disease free survival): 0 (no recurrence)	dfs_time (disease free survival time, months): 70.6	0	70.6	9.76878	8.30418	9.03648
ajcc_stage: 3	dfs_event (disease free survival): 1 (cancer recurrence)	dfs_time (disease free survival time, months): 3.87	1	13.83	8.2172	9.82759	9.02239
ajcc_stage: 4	dfs_event (disease free survival): NA	dfs_time (disease free survival time, months): NA	1	92.77	8.82009	9.20596	9.01302
ajcc_stage: 2	dfs_event (disease free survival): 0 (no recurrence)	dfs_time (disease free survival time, months): 95.03	0	95.03	9.12057	8.90273	9.01165
ajcc_stage: 2	dfs_event (disease free survival): 0 (no recurrence)	dfs_time (disease free survival time, months): 95.47	0	95.47	8.91447	9.10691	9.01069
ajcc_stage: 4	dfs_event (disease free survival): NA	dfs_time (disease free survival time, months): NA	0	56.43	8.57098	9.44804	9.00951
ajcc_stage: 4	dfs_event (disease free survival): NA	dfs_time (disease free survival time, months): NA	1	49	8.90854	9.07977	8.99416
ajcc_stage: 4	dfs_event (disease free survival): NA	dfs_time (disease free survival time, months): NA	1	36	8.75459	9.21543	8.98501
ajcc_stage: 4	dfs_event (disease free survival): NA	dfs_time (disease free survival time, months): NA	0	36.13	8.50605	9.44537	8.97571
ajcc_stage: 4	dfs_event (disease free survival): NA	dfs_time (disease free survival time, months): NA	1	3.57	8.22443	9.72689	8.97566
ajcc_stage: 1	dfs_event (disease free survival): 0 (no recurrence)	dfs_time (disease free survival time, months): 24.1	0	24.1	7.87571	10.0328	8.95427
ajcc_stage: 4	dfs_event (disease free survival): NA	dfs_time (disease free survival time, months): NA	0	27.1	9.16325	8.73442	8.94883
ajcc_stage: 2	dfs_event (disease free survival): 0 (no recurrence)	dfs_time (disease free survival time, months): 84.43	0	84.43	8.31021	9.5827	8.94646
ajcc_stage: 1	dfs_event (disease free survival): 0 (no recurrence)	dfs_time (disease free survival time, months): 35	0	35	8.41455	9.46863	8.94159
ajcc_stage: 3	dfs_event (disease free survival): 0 (no recurrence)	dfs_time (disease free survival time, months): 11.43	0	11.43	8.12535	9.73883	8.93209
ajcc_stage: 1	dfs_event (disease free survival): 0 (no recurrence)	dfs_time (disease free survival time, months): 24.33	0	24.33	8.39889	9.46171	8.9303
ajcc_stage: 1	dfs_event (disease free survival): 0 (no recurrence)	dfs_time (disease free survival time, months): 54.47	0	54.47	8.90219	8.93268	8.91744
ajcc_stage: 4	dfs_event (disease free survival): NA	dfs_time (disease free survival time, months): NA	1	18	8.81828	8.95812	8.8882
ajcc_stage: 3	dfs_event (disease free survival): 0 (no recurrence)	dfs_time (disease free survival time, months): 85.63	0	85.63	8.89822	8.82911	8.86366
ajcc_stage: 2	dfs_event (disease free survival): 0 (no recurrence)	dfs_time (disease free survival time, months): 40.47	0	40.47	8.44435	9.27635	8.86035
ajcc_stage: 3	dfs_event (disease free survival): 0 (no recurrence)	dfs_time (disease free survival time, months): 110.5	0	110.5	8.40899	9.23612	8.82256
ajcc_stage: 2	dfs_event (disease free survival): 0 (no recurrence)	dfs_time (disease free survival time, months): 8.43	0	8.43	7.78244	9.85539	8.81892
ajcc_stage: 3	dfs_event (disease free survival): 0 (no recurrence)	dfs_time (disease free survival time, months): 41.47	0	41.47	9.01976	8.58662	8.80319
ajcc_stage: 2	dfs_event (disease free survival): 0 (no recurrence)	dfs_time (disease free survival time, months): 84.2	0	84.2	7.96765	9.63699	8.80232
ajcc_stage: 2	dfs_event (disease free survival): 0 (no recurrence)	dfs_time (disease free survival time, months): 53.03	0	53.03	8.34909	9.22318	8.78613
ajcc_stage: 4	dfs_event (disease free survival): NA	dfs_time (disease free survival time, months): NA	1	16.1	8.88071	8.65531	8.76801
ajcc_stage: 1	dfs_event (disease free survival): 0 (no recurrence)	dfs_time (disease free survival time, months): 21.63	0	21.63	8.44394	9.0896	8.76677
ajcc_stage: 1	dfs_event (disease free survival): 0 (no recurrence)	dfs_time (disease free survival time, months): 107.1	0	107.1	8.81979	8.66763	8.74371
ajcc_stage: 3	dfs_event (disease free survival): 0 (no recurrence)	dfs_time (disease free survival time, months): 30.33	0	30.33	8.51487	8.95498	8.73493
ajcc_stage: 2	dfs_event (disease free survival): 0 (no recurrence)	dfs_time (disease free survival time, months): 19.77	0	19.77	8.39033	9.07747	8.7339
ajcc_stage: 1	dfs_event (disease free survival): 0 (no recurrence)	dfs_time (disease free survival time, months): 37	0	37	8.74761	8.71513	8.73137
ajcc_stage: 3	dfs_event (disease free survival): 0 (no recurrence)	dfs_time (disease free survival time, months): 44.7	0	44.7	8.46495	8.98954	8.72725
ajcc_stage: 3	dfs_event (disease free survival): 0 (no recurrence)	dfs_time (disease free survival time, months): 21.57	0	21.57	8.48315	8.92956	8.70636
ajcc_stage: 1	dfs_event (disease free survival): 0 (no recurrence)	dfs_time (disease free survival time, months): 101.3	0	101.3	8.45121	8.9538	8.70251
ajcc_stage: 2	dfs_event (disease free survival): 0 (no recurrence)	dfs_time (disease free survival time, months): 3.83	0	3.83	8.20922	9.14118	8.6752
ajcc_stage: 1	dfs_event (disease free survival): 0 (no recurrence)	dfs_time (disease free survival time, months): 30.8	0	30.8	8.05843	9.2725	8.66547
ajcc_stage: 1	dfs_event (disease free survival): 0 (no recurrence)	dfs_time (disease free survival time, months): 31.33	0	31.33	8.36077	8.95148	8.65613
ajcc_stage: 3	dfs_event (disease free survival): 0 (no recurrence)	dfs_time (disease free survival time, months): 25.1	0	25.1	8.41705	8.89454	8.65579
ajcc_stage: 1	dfs_event (disease free survival): 0 (no recurrence)	dfs_time (disease free survival time, months): 13.87	0	13.87	8.26622	9.04478	8.6555
ajcc_stage: 4	dfs_event (disease free survival): NA	dfs_time (disease free survival time, months): NA	1	12.67	8.20408	9.07445	8.63927
ajcc_stage: 2	dfs_event (disease free survival): 0 (no recurrence)	dfs_time (disease free survival time, months): 9.6	0	9.6	8.18755	9.07231	8.62993
ajcc_stage: 3	dfs_event (disease free survival): 0 (no recurrence)	dfs_time (disease free survival time, months): 30.93	0	30.93	8.33673	8.91492	8.62583
ajcc_stage: 3	dfs_event (disease free survival): 1 (cancer recurrence)	dfs_time (disease free survival time, months): 11.7	0	18.07	8.1312	9.11559	8.62339
ajcc_stage: 1	dfs_event (disease free survival): 0 (no recurrence)	dfs_time (disease free survival time, months): 55.1	0	55.1	8.64277	8.60276	8.62276
ajcc_stage: 4	dfs_event (disease free survival): NA	dfs_time (disease free survival time, months): NA	1	6.83	8.31705	8.90765	8.61235
ajcc_stage: 2	dfs_event (disease free survival): 0 (no recurrence)	dfs_time (disease free survival time, months): 37.17	0	37.17	8.98608	8.10777	8.54692
ajcc_stage: 2	dfs_event (disease free survival): 0 (no recurrence)	dfs_time (disease free survival time, months): 92.37	0	92.37	8.24014	8.8302	8.53517
ajcc_stage: 3	dfs_event (disease free survival): 0 (no recurrence)	dfs_time (disease free survival time, months): 12.97	0	12.97	8.28734	8.75907	8.5232
ajcc_stage: 2	dfs_event (disease free survival): 0 (no recurrence)	dfs_time (disease free survival time, months): 42.87	0	42.87	8.0978	8.94125	8.51953
ajcc_stage: 1	dfs_event (disease free survival): 0 (no recurrence)	dfs_time (disease free survival time, months): 49.5	0	49.5	8.64634	8.39048	8.51841
ajcc_stage: 3	dfs_event (disease free survival): 0 (no recurrence)	dfs_time (disease free survival time, months): 108.57	0	108.57	8.89142	8.10606	8.49874
ajcc_stage: 2	dfs_event (disease free survival): 0 (no recurrence)	dfs_time (disease free survival time, months): 11.43	0	11.43	8.31708	8.67803	8.49756
ajcc_stage: 2	dfs_event (disease free survival): 0 (no recurrence)	dfs_time (disease free survival time, months): 0.43	0	0.43	8.15584	8.81018	8.48301
ajcc_stage: 3	dfs_event (disease free survival): 0 (no recurrence)	dfs_time (disease free survival time, months): 20.43	0	20.43	8.25111	8.67294	8.46202
ajcc_stage: 2	dfs_event (disease free survival): 0 (no recurrence)	dfs_time (disease free survival time, months): 83.77	0	83.77	8.76267	8.10444	8.43356
ajcc_stage: 2	dfs_event (disease free survival): 0 (no recurrence)	dfs_time (disease free survival time, months): 9.2	0	9.2	8.15823	8.70802	8.43313
ajcc_stage: 3	dfs_event (disease free survival): 0 (no recurrence)	dfs_time (disease free survival time, months): 20.77	0	20.77	8.2703	8.57953	8.42491
ajcc_stage: 3	dfs_event (disease free survival): 0 (no recurrence)	dfs_time (disease free survival time, months): 54	0	54	8.18949	8.62358	8.40653
ajcc_stage: 3	dfs_event (disease free survival): 1 (cancer recurrence)	dfs_time (disease free survival time, months): 41.53	1	48.23	8.41433	8.34673	8.38053
ajcc_stage: 4	dfs_event (disease free survival): NA	dfs_time (disease free survival time, months): NA	1	16.2	8.54461	8.2056	8.3751
ajcc_stage: 3	dfs_event (disease free survival): 0 (no recurrence)	dfs_time (disease free survival time, months): 57.2	0	57.2	8.03606	8.70401	8.37003
ajcc_stage: 2	dfs_event (disease free survival): 1 (cancer recurrence)	dfs_time (disease free survival time, months): 10.53	0	35.37	7.79263	8.83612	8.31437
ajcc_stage: 3	dfs_event (disease free survival): 0 (no recurrence)	dfs_time (disease free survival time, months): 41	0	41	8.22896	8.37947	8.30421
ajcc_stage: 4	dfs_event (disease free survival): NA	dfs_time (disease free survival time, months): NA	1	2.03	7.99838	8.21091	8.10464
ajcc_stage: 1	dfs_event (disease free survival): 0 (no recurrence)	dfs_time (disease free survival time, months): 97.53	0	97.53	8.28273	7.76201	8.02237
ajcc_stage: 1	dfs_event (disease free survival): 0 (no recurrence)	dfs_time (disease free survival time, months): 40.07	0	40.07	8.04177	7.98512	8.01344
ajcc_stage: 4	dfs_event (disease free survival): NA	dfs_time (disease free survival time, months): NA	1	12.77	8.27262	7.5041	7.88836
ajcc_stage: 2	dfs_event (disease free survival): 0 (no recurrence)	dfs_time (disease free survival time, months): 46.2	0	46.2	7.03412	8.23584	7.63498
