# Supplementary material for: High PHD Finger Protein 19 (PHF19) expression predicts poor prognosis in colorectal cancer: a retrospective study
Source: PeerJ journal article supplement (doi:10.7717/peerj.11551), 2021-06-01
Supplement: Raw_data.zip [file IHC results.xls]

## Sheet: data
id	stain score	positive ratio	postive score	IHCscore	PHF19 level	month	status 1,death;0,live	sex	age	liver meta	Grade	tumor size	T stage	N stage	M stage	TNM stage	CA199
1	3	0.7	1	3	L	144.567	0	male	26	0	moderate	4.5	2	N0	M0	1
2	4	0.8	3	12	H	58.1	1	male	75	0	moderate	3	2	N0	M0	1	CA199(+)
3	3	0.7	1	3	L	82.4333	0	female	74	0	moderate	1.3	2	N0	M0	1	CA19-9(-)
4	3	0.7	1	3	L	80.6667	0	male	55	0	moderate	6	1	N0	M0	1	CA19-9(+++)
5	3	0.7	1	3	L	80.5333	0	male	73	0	moderate	4.7	1	N0	M0	1	CA19-9(-)
6	4	0.8	2	8	H	78.0333	0	female	32	0	high	4.9	1	N0	M0	1	CA19-9(+++)
7	3	0.7	2	6	H	76.2667	0	male	56	0	moderate		2	N0	M0	1	CA19-9(+++)
8	1	0.02	1	1	L	75.8333	0	female	60	0	moderate	3.7	1	N0	M0	1	CA19-9(+++)
9	4	0.8	1	4	H	73.0667	0	male	51	0	moderate	3.2	1	N0	M0	1	CA19-9(+++)
10	4	0.8	1	4	H	40	1	female	36	0	moderate	5	3	N0	M0	2
11	1	0.15	2	2	L	137.367	0	male	33	0	Low	4.5	3	N0	M0	2	CA199(+)
12	3	0.7	2	6	H	134.867	0	male	65	0	moderate	4	3	N0	M0	2	CA199(+)
13	3	0.55	2	6	H	35.5667	1	female	71	0	moderate	4	4	N0	M0	2	CA199(-)
14	3	0.7	2	6	H	126.633	0	male	81	0	moderate	6	4	N0	M0	2	CA199(+)
15	1	0.2	2	2	L	123.8	0	female	52	0	moderate	8	3	N0	M0	2	CA199(-)
16	4	0.8	2	8	H	28	1	female	74	0	Low	7	3	N0	M0	2	CA199(+)
17	2	0.45	1	2	L	123.367	0	female	66	0	moderate	6	4	N0	M0	2	CA199(+)
18	4	0.8	2	8	H	56	1	female	50	0	moderate	8	4	N0	M0	2	CA199(+)
19	4	0.8	1	4	H	120.2	0	female	58	0	moderate	2.5	3	N0	M0	2	CA199(+)
20	3	0.7	1	3	L	119.833	0	female	48	0	moderate	7.5	3	N0	M0	2	CA199(+)
21	3	0.7	2	6	H	117.633	0	male	45	0	moderate	10	3	N0	M0	2	CA199(+)
22	1	0.15	1	1	L	116.1	0	female	69	0	moderate	7	4	N0	M0	2	CA199(+)
23	4	0.8	1	4	H	110.167	0	male	57	0	moderate	3	3	N0	M0	2	CA199(+)
24	3	0.7	3	9	H	107.333	0	male	48	0	moderate	4	3	N0	M0	2	CA199(+)
25	3	0.55	1	3	L	102.233	0	male	60	0	moderate	8	3	N0	M0	2	CA199(+)
26	3	0.6	1	3	L	89.4333	0	male	78	0	moderate	3	3	N0	M0	2	CA19-9(-)
27	2	0.45	2	4	H	87.4333	0	female	53	0	moderate	7.5	3	N0	M0	2	CA19-9(-)
28	3	0.65	2	6	H	84.6	0	female	69	0	moderate	6	3	N0	M0	2
29	3	0.7	1	3	L	82.8667	0	male	56	0	moderate	8	4	N0	M0	2	CA19-9(-)
30	4	0.9	3	12	H	54.3	1	male	78	0	moderate	3.6	3	N0	M0	2	CA19-9(+)
31	4	0.8	3	12	H	81	0	male	72	0	moderate	2	3	N0	M0	2	CA19-9(+)
32	3	0.65	1	3	L	80.1333	0	female	39	0	moderate	5	4	N0	M0	2	CA19-9(+)
33	3	0.6	1	3	L	103.733	0	female	76	0	moderate	3.9	3	N0	M0	2	CA19-9(++)
34	4	0.8	3	12	H	75.5	0	female	42	0	moderate	9	3	N0	M0	2	CA19-9(+++)
35	3	0.7	2	6	H	71.7667	0	male	80	0	moderate	3.2	3	N0	M0	2	CA19-9(+)
36	1	0.05	2	2	L	71.0333	0	male	41	0	moderate	7	3	N0	M0	2	CA19-9(+)
37	3	0.6	2	6	H	68.0333	0	male	62	0	moderate	7.2	3	N0	M0	2	CA19-9(+)
38	4	0.8	1	4	H	64.9667	1	female	73	0	moderate	3	4	N1	M0	3	CA199(+)
39	3	0.7	2	6	H	27.1	1	female	61	0	moderate	5	4	N1	M0	3	CA199(+)
40	2	0.5	1	2	L	133.433	0	male	63	0	Low	6.5	3	N1	M0	3	CA199(-)
41	3	0.65	1	3	L	132.967	0	female	36	0	moderate	8	3	N1	M0	3	CA199(-)
42	4	0.8	1	4	H	71	1	female	73	0	Low	6	3	N1	M0	3	CA199(-)
43	4	0.8	3	12	H	28.0333	1	female	73	0	high	4	3	N1	M0	3	CA199(-)
44	4	0.8	1	4	H	50.3	1	female	77	0	Low	8.5	4	N1	M0	3	CA199(-)
45	3	0.7	2	6	H	65.6	1	male	49	0	Low	6	2	N1	M0	3	CA199(-)
46	3	0.7	3	9	H	118.767	0	female	68	0	moderate	9	3	N1	M0	3	CA199(+)
47	3	0.7	2	6	H	117.633	0	male	30	0	Low	12	4	N1	M0	3	CA199(+)
48	4	0.8	1	4	H	82.6667	1	male	78	0	moderate	6	3	N1	M0	3	CA199(+)
49	3	0.7	1	3	L	104.033	0	male	65	0	high	2	2	N1	M0	3	CA199(-)
50	1	0.05	2	2	L	9.5	1	male	16	0	Low	6	3	N1	M0	3	CA199(+)
51	3	0.7	3	9	H	81.3667	1	female	77	0	Low	4	3	N1	M0	3	CA19-9(-)
52	3	0.6	2	6	H	41.9667	0	male	46	0	moderate	5	3	N1	M0	3	CA19-9(+)
53	4	0.8	3	12	H	112.333	0	female	44	0	moderate	4.6	4	N1	M0	3	CA19-9(+)
54	1	0.05	1	1	L	107.9	0	male	61	0	moderate	3.2	3	N1	M0	3	CA19-9(+)
55	3	0.7	1	3	L	87	0	female	46	0	moderate	7.2	4	N1	M0	3	CA19-9(+)
56	4	0.8	3	12	H	80.4	0	female	33	0	moderate	7	2	N1	M0	3	CA19-9(+++)
57	4	0.45	2	8	H	30.2333	1	female	61	0	moderate	3.7	2	N1	M0	3	CA19-9(+)
58	4	0.8	3	12	H	53.2667	1	male	78	0	moderate	2.9	2	N1	M0	3	CA19-9(+++)
59	4	0.8	1	4	H	30.1333	1	male	53	0	moderate	5.2	3	N1	M0	3	CA19-9(+++)
60	4	0.8	1	4	H	78.0333	0	male	74	0	moderate	5.4	2	N1	M0	3	CA19-9(+++)
61	3	0.55	2	6	H	35.3333	1	male	41	1	moderate	2	2	N0	M1	4
62	4	0.85	3	12	H	30.7333	1	male	61	1	Low	10	3	N0	M1	4	CA199(-)
63	4	0.8	1	4	H	53.4667	1	male	65	1	Low	5	4	N0	M1	4
64	4	0.8	1	4	H	9.03333	1	female	73	1	moderate	8	4	N0	M1	4	CA19-9(+)
65	2	0.3	3	6	H	22.5667	1	male	64	1	Low	5.5	4	N1	M1	4	CA199(-)
66	4	0.8	1	4	H	36	1	female	51	1	moderate	4	3	N1	M1	4	CA199(-)
67	4	0.8	2	8	H	41.3	1	male	52	0	Low	3	3	N1	M1	4	CA19-9(-)
68	4	0.8	2	8	H	51.5	1	male	45	1	moderate	4	3	N0	M1	4	CA19-9(+)
69	4	0.8	2	8	H	13.6	1	male	69	1	moderate	4.5	3	N0	M1	4
70	2	0.3	3	6	H	3.4	1	male	78	1	moderate	3	4	N0	M1	4	CA199(-)
71	4	0.8	2	8	H	19	1	female	58	1	moderate	3	4	N0	M1	4
72	4	0.8	2	8	H	33	1	female	62	1	moderate	4.2	3	N0	M1	4	CA19-9(-)
73	4	0.8	1	4	H	38.6333	1	male	66	1	moderate	4	3	N0	M1	4	CA19-9(-)
74	4	0.8	2	8	H	5.96667	1	female	61	1	moderate	4	3	N0	M1	4	CA19-9(++)
75	3	0.55	1	3	L	31.9	1	female	49	1	moderate	4	3	N1	M1	4	CA19-9(-)
76	4	0.8	2	8	H	16.3	1	male	70	1	moderate	3.2	4	N1	M1	4	CA19-9(++)
77	1	0.01	1	1	L	19.1667	1	female	63	1	moderate	3.5	3	N0	M1	4	CA19-9(-)
78	4	0.8	3	12	H	19.0333	1	female	54	1	moderate	2	3	N0	M1	4	CA19-9(-)
79	4	0.8	3	12	H	19.3333	1	male	56	1	moderate	2.5	2	N0	M1	4	CA19-9(-)
80	4	0.8	2	8	H	41.5333	1	female	47	0	moderate	6	3	N1	M1	4	CA19-9(+++)
81	2	0.35	2	4	H	34.1333	1	male	46	0	Low	11.5	4	N0	M0	2
82	4	0.8	1	4	H	23.7	1	female	49	0	Low	3.5	2	N1	M0	3	CA199(-)
83	4	0.8	1	4	H	44.6667	1	male	40	1	moderate	3.2	3	N1	M1	4	CA19-9(++)
