# Supplementary material for: High PHD Finger Protein 19 (PHF19) expression predicts poor prognosis in colorectal cancer: a retrospective study
Source: PeerJ journal article supplement (doi:10.7717/peerj.11551), 2021-06-01
Supplement: Raw_data.zip [file TCGA data.xlsx]

## Sheet: Sheet1
id	阿	c	v	phf19	PHF19	Primary site	age	sex	race	disease_type	bmi.exposures	stage	pathologic_M	pathologic_N	pathologic_T	status	day	lymphatic_invasion	venous_invasion	microsatellite_instability	non_nodal_tumor_deposits	braf_gene_analysis_result	colon_polyps_present	history_of_colon_polyps	perineural_invasion_present	person_neoplasm_cancer_status	preoperative_pretreatment_cea_level	radiation_therapy
TCGA	AZ	4313	01A	19	High	Colon	51	female	white	Adenomas and Adenocarcinomas		I	M0	N0	T1	0	2310	YES	YES	NA	NO	NA	NA	NA	NO	TUMOR FREE	5.9	NO
TCGA	DY	A1DE	01A	18.5	High	Rectum	56	female	white	Adenomas and Adenocarcinomas	27.3438	II	M0	N0	T3	0	3932	NO	NO	NO	NA	Normal	NA	NO	NA	NA	NA	NA
TCGA	NH	A5IV	01A	18.3	High	Colon	90	female	black or african american	Adenomas and Adenocarcinomas	19.7036	II	MX	N0	T3	0	588	NO	NO	NA	NO	NA	NO	YES	NO	NA	11.8	NO
TCGA	DM	A28A	01A	17.7	High	Colon	78	male	white	Adenomas and Adenocarcinomas	24.3375	III	M0	N2	T3	1	805	NO	NO	NO	NA	Normal	NA	NO	NA	NA	NA	NA
TCGA	A6	2683	01A	17.3	High	Colon	57	female	white	Adenomas and Adenocarcinomas	20.7914	IV	M1	N0	T4	1	504	NO	NO	NO	NO	NA	NO	YES	NA	WITH TUMOR	2614	NO
TCGA	D5	6531	01A	16.2	High	Colon	75	male	white	Adenomas and Adenocarcinomas	21.5139	II	M0	N0	T3	0	540	NO	NO	NA	NO	NA	NA	NO	NO	TUMOR FREE	1.9	NO
TCGA	F5	6863	01A	16.2	High	Rectum	71	female	white	Adenomas and Adenocarcinomas	27.9431	III	M0	N1	T4	1	361	NO	NO	NA	NO	NA	NO	NO	NO	WITH TUMOR	NA	NO
TCGA	DM	A1DA	01A	15.7	High	Colon	71	female	white	Adenomas and Adenocarcinomas	23.3355	III	M0	N2	T3	1	228	NA	NA	NO	NA	Normal	NA	NA	NA	NA	NA	NA
TCGA	F4	6855	01A	15	High	Colon	70	female	white	Adenomas and Adenocarcinomas	28.6851	II	M0	N0	T3	0	1442	NO	NO	NA	NO	NA	NO	NA	NO	TUMOR FREE	NA	NO
TCGA	AD	6965	01A	14.7	High	Colon	62	male	white	Adenomas and Adenocarcinomas	28.3675	III	M0	N2	T4	0	805	YES	YES	NA	NO	NA	NA	NA	NA	WITH TUMOR	NA	NO
TCGA	DY	A1DG	01A	14.7	High	Rectum	75	male	white	Adenomas and Adenocarcinomas	28.0816	IV	M1	N1	T3	1	1566	NA	NA	NO	NA	Normal	YES	NO	NA	NA	NA	NA
TCGA	CK	4948	01B	14.1	High	Colon	45	female	white	Adenomas and Adenocarcinomas		III	M0	N1	T3	0	4502	NA	NA	NO	YES	NA	NO	NO	NA	TUMOR FREE	1.2	NO
TCGA	CM	4744	01A	14	High	Colon	69	male	white	Adenomas and Adenocarcinomas	26.7849	I	M0	N0	T2	0	609	YES	YES	NA	NO	NA	YES	YES	NO	TUMOR FREE	0.9	NO
TCGA	F5	6814	01A	13.8	High	Rectum	57	male	white	Adenomas and Adenocarcinomas	19.9184	II	M0	N0	T3	0	1131	NO	NO	NA	NO	NA	NO	NO	NO	TUMOR FREE	NA	NO
TCGA	A6	A56B	01A	13.8	High	Colon	57	male	black or african american	Adenomas and Adenocarcinomas	23.8272	III	M0	N1	T3	1	1711	YES	NO	NA	NO	NA	YES	NO	NA	TUMOR FREE	13.2	NO
TCGA	NH	A6GC	01A	13.8	High	Colon	66	female	black or african american	Cystic, Mucinous and Serous Neoplasms	39.2545	IV	M1b	N1	T4	0	389	NO	NO	NO	NO	NA	NO	NA	NO	NA	NA	NO
TCGA	D5	6922	01A	13.7	High	Colon	76	male	white	Adenomas and Adenocarcinomas	27.102	III	M0	N1	T3	0	308	YES	NO	NA	NO	NA	NO	NO	NO	TUMOR FREE	4.3	NO
TCGA	AY	A69D	01A	13.3	High	Colon	55	female	black or african american	Adenomas and Adenocarcinomas	37.8329	II	M0	N0	T3	0	543	NO	NO	NO	NO	NA	NO	NO	NO	TUMOR FREE	1	NO
TCGA	A6	2671	01A	13.2	High	Colon	85	male	white	Adenomas and Adenocarcinomas	20.1102	IV	M1	N2	T3	1	1331	YES	YES	NA	YES	NA	NO	YES	NA	WITH TUMOR	17.4	NO
TCGA	CM	6675	01A	13.2	High	Colon	35	male	black or african american	Adenomas and Adenocarcinomas	26.8524	IV	M1b	N2	T3	0	397	NO	YES	NA	YES	NA	NO	NO	YES	TUMOR FREE	2	NO
TCGA	DC	4745	01A	13.1	High	Rectosigmoid junction	49	female	white	Adenomas and Adenocarcinomas	34.4536	III	M0	N1	T3	0	639	NO	NO	NA	NO	NA	NO	YES	NO	TUMOR FREE	1.6	NO
TCGA	AF	3911	01A	12.8	High	Rectum	48	male	white	Adenomas and Adenocarcinomas	29.0697	III	MX	N2	T3	0	1148	YES	NO	NO	YES	NA	YES	NA	NA	TUMOR FREE	1.1	YES
TCGA	D5	6931	01A	12.4	High	Colon	77	male	white	Adenomas and Adenocarcinomas	22.0932	III	M0	N2	T4	0	365	YES	NO	NA	NO	NA	NO	NO	YES	TUMOR FREE	6.9	NO
TCGA	DC	6160	01A	12.1	High	Rectosigmoid junction	68	male	white	Adenomas and Adenocarcinomas	32.5368	I	M0	N0	T2	0	1339	NO	YES	NA	NO	NA	YES	NO	YES	TUMOR FREE	5.2	NO
TCGA	D5	6538	01A	12.1	High	Colon	79	female	white	Adenomas and Adenocarcinomas	24.6711	III	M0	N2	T3	0	521	NO	YES	NA	NO	NA	NO	NO	NO	TUMOR FREE	23.5	NO
TCGA	D5	6932	01A	12	High	Colon	69	male	white	Adenomas and Adenocarcinomas	26.5731	II	M0	N0	T3	0	346	NO	NO	NA	NO	NA	YES	NO	YES	NA	3.8	NO
TCGA	QG	A5YW	01A	11.9	High	Colon	55	female	black or african american	Adenomas and Adenocarcinomas	29.1938	III	MX	N2	T3	0	896	NO	NO	NA	YES	NA	NO	NO	NO	TUMOR FREE	11.37	NO
TCGA	CM	5348	01A	11.8	High	Colon	72	male	white	Adenomas and Adenocarcinomas	32.1804	III	M0	N1	T3	0	699	YES	NO	NA	NO	NA	YES	YES	YES	TUMOR FREE	3.6	NO
TCGA	AF	2693	01A	11.7	High	Rectosigmoid junction	75	male	white	Adenomas and Adenocarcinomas	33.0995	I	MX	N0	T2	0	1155	NO	NO	NA	NO	NA	NO	NO	NA	TUMOR FREE	4	NO
TCGA	CA	6718	01A	11.7	High	Colon	46	male	asian	Adenomas and Adenocarcinomas	22.3214	II	M0	N0	T3	1	306	NA	NA	NA	NA	NA	NA	NA	NA	WITH TUMOR	NA	NO
TCGA	AZ	6600	01A	11.6	High	Colon	64	male	black or african american	Adenomas and Adenocarcinomas		IV	M1	N1	T4	1	368	YES	YES	NA	NA	NA	NA	NA	YES	WITH TUMOR	20.1	NO
TCGA	G4	6309	01A	11.5	High	Colon	40	female	black or african american	Adenomas and Adenocarcinomas	21.1131	III	M0	N1	T3	0	2600	NO	NO	YES	NO	NA	YES	NO	NO	TUMOR FREE	NA	NO
TCGA	RU	A8FL	01A	11.3	High	Colon	51	male	black or african american	Adenomas and Adenocarcinomas	35.3817	III	MX	N2	T3	0	1177	NA	NA	NO	NO	NA	NO	NO	NA	WITH TUMOR	24.6	NO
TCGA	CM	4748	01A	11.1	High	Colon	53	male	white	Cystic, Mucinous and Serous Neoplasms	28.9902	III	M0	N1	T4	0	792	YES	YES	NA	YES	NA	NO	YES	NO	TUMOR FREE	2	NO
TCGA	AZ	4323	01A	11	High	Colon	37	male	white	Adenomas and Adenocarcinomas		IV	M1	N2	T4	1	43	NA	YES	NA	NA	NA	NA	NA	NA	WITH TUMOR	NA	NO
TCGA	G4	6297	01A	11	High	Colon	55	female	white	Adenomas and Adenocarcinomas		IV	M1	N2	T3	0	2506	YES	YES	NA	NO	NA	YES	YES	YES	WITH TUMOR	NA	NO
TCGA	AD	6548	01A	11	High	Colon	81	female	white	Adenomas and Adenocarcinomas	31.6856	I	M0	N0	T2	0	650	NO	NA	NA	NA	NA	YES	YES	NA	TUMOR FREE	2.6	NO
TCGA	DM	A28H	01A	11	High	Colon	50	male	white	Adenomas and Adenocarcinomas	27.4587	III	M0	N2	T3	0	3561	NO	NO	NO	NA	Normal	NA	NO	NA	NA	NA	NA
TCGA	SS	A7HO	01A	11	High	Colon	44	female	black or african american	Adenomas and Adenocarcinomas	34.96	II	M0	N0	T4	0	1829	YES	YES	NA	NO	NA	NO	NO	NO	WITH TUMOR	0	NO
TCGA	G4	6627	01A	10.9	High	Colon	84	male	white	Adenomas and Adenocarcinomas	25.8264	II	M0	N0	T3	0	2275	NO	NO	NA	NO	NA	YES	NO	NO	TUMOR FREE	1.8	NO
TCGA	DM	A1D6	01A	10.9	High	Colon	88	male	white	Cystic, Mucinous and Serous Neoplasms	26.7299	II	M0	N0	T3	1	1518	NO	NO	NO	NA	Normal	NA	NO	NA	NA	NA	NA
TCGA	AF	2692	01A	10.8	High	Rectum	54	female	white	Adenomas and Adenocarcinomas	22.2837	II	M0	N0	T3	0	412	NO	NO	NA	NO	NA	YES	NO	NA	WITH TUMOR	10.6	NO
TCGA	DC	6681	01A	10.8	High	Rectosigmoid junction	70	female	white	Adenomas and Adenocarcinomas	27.6742	IV	M1a	N2	T3	0	790	YES	YES	NA	NO	Normal	NO	NO	YES	TUMOR FREE	7.9	NO
TCGA	A6	2680	01A	10.7	High	Colon	72	female	black or african american	Adenomas and Adenocarcinomas	23.0692	II	M0	N0	T3	0	1068	NO	NO	NA	NO	NA	NO	NA	NA	TUMOR FREE	3.2	NO
TCGA	A6	2681	01A	10.7	High	Colon	73	female	white	Adenomas and Adenocarcinomas	27.5109	II	M0	N0	T3	0	1387	NO	NO	NA	NO	NA	NO	NO	NA	TUMOR FREE	2.4	NO
TCGA	DY	A1DD	01A	10.7	High	Rectosigmoid junction	77	female	white	Adenomas and Adenocarcinomas	17.2584	III	M0	N1	T3	1	1741	NA	NA	NO	NA	Normal	NA	NA	NA	NA	NA	NA
TCGA	F5	6861	01A	10.6	High	Rectum	60	female	white	Adenomas and Adenocarcinomas	24.3865	II	M0	N0	T3	0	1160	NO	NO	NA	NO	NA	NO	NO	NO	TUMOR FREE	NA	NO
TCGA	A6	2676	01A	10.5	High	Colon	75	female	white	Adenomas and Adenocarcinomas	19.1298	II	M0	N0	T4	1	1305	NO	NO	NA	NO	NA	NO	NO	NA	TUMOR FREE	6.3	NO
TCGA	CK	4951	01A	10.4	High	Colon	79	female	white	Cystic, Mucinous and Serous Neoplasms		II	M0	N0	T3	1	2134	NO	YES	NA	NO	NA	NO	YES	NO	TUMOR FREE	6.2	NO
TCGA	A6	5657	01A	10.3	High	Colon	65	male	black or african american	Adenomas and Adenocarcinomas	33.6668	III	M0	N1	T3	0	962	YES	NO	NA	NO	NA	NO	NO	NA	TUMOR FREE	1.5	NO
TCGA	EI	6882	01A	10.3	High	Rectum	59	male	white	Adenomas and Adenocarcinomas	34.0866	II	M0	N0	T3	0	262	NO	NO	NO	NO	NA	NO	NO	NO	TUMOR FREE	1.3	NO
TCGA	DM	A1D9	01A	10.3	High	Colon	67	female	white	Adenomas and Adenocarcinomas	41.8642	II	M0	N0	T3	0	4270	NO	NO	NO	NA	NA	YES	NO	NA	NA	NA	NA
TCGA	A6	2679	01A	10.2	High	Colon	73	female	white	Adenomas and Adenocarcinomas	24.1764	II	MX	N0	T3	0	1366	NO	NO	NA	NO	NA	NO	YES	NA	TUMOR FREE	15.7	NO
TCGA	DT	5265	01A	10.2	High	Rectum	51	male	asian	Cystic, Mucinous and Serous Neoplasms		II	M0	N0	T3	0	384	NA	NA	NA	NA	NA	NA	NA	NA	NA	NA	YES
TCGA	F4	6806	01A	10.2	High	Colon	59	female	white	Adenomas and Adenocarcinomas	23.6614	I	M0	N0	T2	0	1260	NO	NO	NO	NO	NA	NO	NO	NO	TUMOR FREE	NA	NO
TCGA	F5	6864	01A	10.2	High	Rectum	74	female	white	Adenomas and Adenocarcinomas	31.6443	III	M0	N2	T3	0	379	NO	NO	NA	NO	NA	NA	NA	NO	TUMOR FREE	NA	NO
TCGA	DM	A1D7	01A	10.2	High	Colon	82	male	white	Cystic, Mucinous and Serous Neoplasms	24.4898	II	M0	N0	T3	1	405	NO	NO	NO	NA	Normal	NA	NA	NA	NA	NA	NA
TCGA	CK	4952	01A	10.1	High	Colon	48	female	white	Cystic, Mucinous and Serous Neoplasms		III	M0	N2	T4	0	475	NO	NO	NO	NO	NA	NO	NO	NO	TUMOR FREE	NA	NA
TCGA	A6	4105	01A	10	High	Colon	79	male	white	Adenomas and Adenocarcinomas	25.6244	II	M0	N0	T3	1	442	NO	NO	NO	NO	NA	YES	NO	NA	TUMOR FREE	NA	NO
TCGA	D5	6927	01A	9.9	High	Colon	34	male	white	Adenomas and Adenocarcinomas	24.2587	II	M0	N0	T3	0	287	NO	NO	NO	NO	NA	NO	NO	NO	TUMOR FREE	0.9	NO
TCGA	AF	2691	01A	9.8	High	Rectosigmoid junction	48	female	white	Adenomas and Adenocarcinomas	18.6545	I	M0	N0	T1	0	1309	NO	NO	NA	NO	NA	NO	NO	NA	TUMOR FREE	1.3	NO
TCGA	CA	5797	01A	9.8	High	Colon	56	male	asian	Adenomas and Adenocarcinomas		II	M0	N0	T3	0	383	NA	NA	NA	NA	NA	NA	NA	NA	TUMOR FREE	NA	NO
TCGA	G4	6628	01A	9.8	High	Colon	78	male	white	Adenomas and Adenocarcinomas	31.8616	I	M0	N0	T2	0	2424	NO	NO	NA	NO	NA	YES	NO	NO	TUMOR FREE	2.1	NO
TCGA	D5	6928	01A	9.8	High	Colon	80	male	white	Cystic, Mucinous and Serous Neoplasms	30.7174	II	M0	N0	T3	0	354	NO	NO	NO	NO	NA	NO	NO	NO	TUMOR FREE	1.8	NO
TCGA	D5	6532	01A	9.7	High	Colon	61	male	white	Adenomas and Adenocarcinomas	30.3871	II	M0	N0	T3	0	555	NO	NO	NA	NO	NA	NA	NO	NO	TUMOR FREE	1.7	NO
TCGA	D5	6540	01A	9.7	High	Colon	66	male	white	Cystic, Mucinous and Serous Neoplasms	24.8584	I	M0	N0	T2	0	491	NO	NO	NA	NO	NA	YES	NO	NO	TUMOR FREE	2	NO
TCGA	AF	4110	01A	9.6	High	Rectum	77	male	white	Adenomas and Adenocarcinomas	26.0299	IV	MX	N2	T4	0	912	YES	YES	NO	YES	NA	YES	NO	NA	TUMOR FREE	28.7	NO
TCGA	EI	6506	01A	9.6	High	Rectum	78	female	white	Adenomas and Adenocarcinomas	24.7676	II	M0	N0	T3	0	625	NO	NO	NA	NO	NA	NO	NO	YES	TUMOR FREE	2.8	NO
TCGA	F4	6854	01A	9.6	High	Colon	77	female	white	Adenomas and Adenocarcinomas	22.8374	II	M0	N0	T3	0	16	NO	NO	NA	NO	NA	NO	NO	NO	TUMOR FREE	NA	NO
TCGA	NH	A8F8	01A	9.6	High	Colon	79	male	black or african american	Adenomas and Adenocarcinomas	24.8112	IV	M1	N2	T4	1	511	YES	YES	NO	YES	NA	NO	YES	NO	WITH TUMOR	24.9	NO
TCGA	T9	A92H	01A	9.6	High	Colon	82	male	black or african american	Adenomas and Adenocarcinomas	19.7222	II	M0	N0	T3	0	362	NO	NO	NO	NO	NA	NO	NO	YES	WITH TUMOR	NA	NO
TCGA	5M	AAT4	01A	9.6	High	Colon	74	male	black or african american	Adenomas and Adenocarcinomas		IV	M1b	N0	T3	1	49	NA	YES	NA	NO	NA	YES	NO	NA	WITH TUMOR	550	NO
TCGA	A6	2678	01A	9.5	High	Colon	43	female	white	Adenomas and Adenocarcinomas	32.8648	III	M0	N1	T3	0	1286	YES	NO	NO	NO	NA	NO	NO	NA	TUMOR FREE	13.5	NO
TCGA	AF	6655	01A	9.5	High	Rectosigmoid junction	66	male	white	Adenomas and Adenocarcinomas	17.7754	III	M0	N1	T2	0	609	YES	NO	NO	NO	NA	NO	YES	NA	TUMOR FREE	1.6	NO
TCGA	EI	6514	01A	9.4	High	Rectum	59	female	white	Adenomas and Adenocarcinomas		II	M0	N0	T3	0	496	NO	NO	NA	NO	NA	NO	NO	NO	TUMOR FREE	5.5	NO
TCGA	G5	6641	01A	9.4	High	Rectosigmoid junction	67	male	white	Cystic, Mucinous and Serous Neoplasms	33.0966	III	MX	N1	T1	0	804	NO	NO	NA	NO	NA	NO	NO	NO	TUMOR FREE	NA	NO
TCGA	EI	6885	01A	9.4	High	Rectum	57	female	white	Adenomas and Adenocarcinomas	19.7055	IV	M1	N1	T3	0	415	YES	NO	NA	NO	NA	NO	NO	YES	WITH TUMOR	7868	NO
TCGA	NH	A50V	01A	9.4	High	Colon	69	male	black or african american	Adenomas and Adenocarcinomas	23.4605	III	M0	N2	T3	0	588	NO	NO	NO	NO	NA	NO	NA	NO	TUMOR FREE	NA	NO
TCGA	AZ	4308	01A	9.3	High	Colon	47	female	white	Adenomas and Adenocarcinomas		III	M0	N1	T3	0	3324	YES	NO	NO	NA	NA	NA	NA	NO	TUMOR FREE	0.5	NO
TCGA	AZ	4684	01A	9.3	High	Rectosigmoid junction	49	male	white	Adenomas and Adenocarcinomas		IV	M1	N2	T3	0	1977	YES	NA	NA	YES	NA	NA	NA	NA	WITH TUMOR	8.9	NO
TCGA	CK	5916	01A	9.3	High	Colon	71	female	white	Adenomas and Adenocarcinomas		I	M0	N0	T1	1	643	YES	NO	NA	NO	NA	NO	YES	NO	WITH TUMOR	3.2	NO
TCGA	G4	6626	01A	9.3	High	Colon	90	male	white	Adenomas and Adenocarcinomas		II	M0	N0	T3	1	1422	NO	NO	NA	NO	NA	NO	NO	NO	TUMOR FREE	NA	NO
TCGA	EI	6917	01A	9.3	High	Rectum	33	male	white	Adenomas and Adenocarcinomas	25.8264	III	M0	N1	T3	0	531	NO	NO	NA	NO	NA	NO	NO	NO	TUMOR FREE	2.1	NO
TCGA	G4	6320	01A	9.2	High	Colon	73	male	white	Adenomas and Adenocarcinomas	37.5044	III	MX	N1	T3	0	804	YES	YES	NA	NO	NA	YES	NO	NO	TUMOR FREE	2.7	NO
TCGA	CI	6620	01A	9.2	High	Rectum	41	female	white	Adenomas and Adenocarcinomas		IV	M1	N1	T3	0	1009	NA	NA	NA	NA	NA	NA	NA	NA	WITH TUMOR	NA	NO
TCGA	D5	6924	01A	9.2	High	Colon	68	male	white	Adenomas and Adenocarcinomas	31.2213	II	M0	N0	T3	0	435	NO	NO	NO	NO	NA	NO	NO	NO	TUMOR FREE	3.1	NO
TCGA	AD	A5EK	01A	9.2	High	Colon	51	male	black or african american	Adenomas and Adenocarcinomas	27.7008	I	MX	N0	T2	0	500	NA	NO	NO	NO	NA	YES	YES	NO	TUMOR FREE	1.2	NO
TCGA	A6	2685	01A	9.1	High	Colon	48	female	black or african american	Adenomas and Adenocarcinomas	26.4355	II	M0	N0	T3	0	1133	NO	NO	NA	NO	NA	NO	NA	NA	TUMOR FREE	29.5	NO
TCGA	DM	A1HA	01A	9.1	High	Colon	82	male	white	Adenomas and Adenocarcinomas	25.2174	III	M0	N2	T3	0	4000	NA	NA	NO	NA	Normal	YES	YES	NA	NA	NA	NA
TCGA	NH	A8F7	01A	9.1	High	Colon	53	female	black or african american	Adenomas and Adenocarcinomas	271.863	II	MX	N0	T3	0	543	NO	NO	NO	NO	NA	NO	NO	NO	WITH TUMOR	100.3	YES
TCGA	A6	2672	01B	9	High	Colon	82	female	white	Adenomas and Adenocarcinomas	20.8933	III	M0	N1	T3	0	1419	YES	YES	NA	NO	NA	NO	YES	NA	TUMOR FREE	3.4	NO
TCGA	CK	4950	01A	9	High	Colon	68	female	black or african american	Cystic, Mucinous and Serous Neoplasms		III	M0	N1	T3	0	2599	NO	NO	NA	NO	NA	NO	NO	NO	TUMOR FREE	NA	NO
TCGA	EF	5830	01A	9	High	Rectum	54	male	white	Adenomas and Adenocarcinomas	28.0763	II	M0	N0	T4	0	106	NO	NO	NO	NO	NA	NO	NO	NO	NA	NA	NO
TCGA	G4	6625	01A	9	High	Colon	77	female	white	Adenomas and Adenocarcinomas	29.5032	II	M0	N0	T3	0	2792	NO	NO	NA	NO	NA	YES	NO	NO	TUMOR FREE	5.5	NO
TCGA	DM	A1D4	01A	9	High	Colon	80	male	white	Adenomas and Adenocarcinomas	20.1771	II	M0	N0	T3	1	2821	NO	NO	NO	NA	Normal	NA	NA	NA	NA	NA	NA
TCGA	DM	A28M	01A	9	High	Colon	63	male	white	Adenomas and Adenocarcinomas	30.4219	II	M0	N0	T3	0	2895	NO	NO	NO	NA	Normal	NA	NO	NA	NA	NA	NA
TCGA	AZ	4315	01A	8.9	High	Colon	61	male	white	Adenomas and Adenocarcinomas		II	M0	N0	T3	0	1776	NO	NO	NA	YES	NA	NA	NA	NO	TUMOR FREE	1.5	NO
TCGA	CM	6163	01A	8.9	High	Colon	74	male	white	Adenomas and Adenocarcinomas	23.6572	I	M0	N0	T1	0	90	NO	YES	NA	NO	NA	YES	NO	YES	TUMOR FREE	8.8	NO
TCGA	D5	6537	01A	8.9	High	Colon	64	male	white	Adenomas and Adenocarcinomas	25.8264	III	MX	N1	T3	1	146	YES	NO	NA	NO	NA	YES	NA	YES	WITH TUMOR	2.7	NO
TCGA	AZ	6601	01A	8.9	High	Colon	68	male	white	Adenomas and Adenocarcinomas	22.4813	II	M0	N0	T3	1	3042	YES	YES	NA	NA	NA	NA	NA	YES	WITH TUMOR	1.8	NO
TCGA	A6	A567	01A	8.9	High	Colon	56	male	black or african american	Adenomas and Adenocarcinomas	23.7664	IV	M1	N1	T3	1	1881	YES	NO	NA	YES	NA	YES	NO	NA	WITH TUMOR	95.8	NO
TCGA	NH	A6GB	01A	8.9	High	Colon	71	female	black or african american	Adenomas and Adenocarcinomas	29.5481	III	MX	N2	T3	0	476	NO	NO	NA	NO	NA	NO	NA	NO	WITH TUMOR	NA	NO
TCGA	AF	6136	01A	8.8	High	Rectosigmoid junction	72	female	white	Adenomas and Adenocarcinomas	25.8286	III	MX	N1	T3	0	741	YES	YES	NO	YES	NA	NO	NO	NA	WITH TUMOR	18.3	YES
TCGA	G4	6317	01A	8.8	High	Colon	51	female	white	Adenomas and Adenocarcinomas	36.3131	III	MX	N2	T3	0	1095	NA	NA	NO	NO	NA	NO	NO	NO	TUMOR FREE	NA	NO
TCGA	A6	6648	01A	8.8	High	Colon	56	male	white	Adenomas and Adenocarcinomas	26.0356	IV	M1a	N0	T3	0	766	NO	NO	NO	NO	NA	NO	NA	NA	TUMOR FREE	2.5	NO
TCGA	DM	A288	01A	8.8	High	Colon	68	male	white	Cystic, Mucinous and Serous Neoplasms	29.4118	III	M0	N2	T3	1	427	NO	NO	NO	NA	NA	NA	NO	NA	NA	NA	NA
TCGA	A6	5664	01A	8.7	High	Colon	80	male	black or african american	Adenomas and Adenocarcinomas	21.6254	III	MX	N2	T4	0	672	YES	YES	NO	YES	NA	YES	YES	NA	WITH TUMOR	17.4	NO
TCGA	CK	5914	01A	8.7	High	Colon	81	male	white	Adenomas and Adenocarcinomas		III	MX	N1	T3	0	669	NO	NO	NA	NO	NA	NO	NO	NO	NA	NA	NA
TCGA	D5	5540	01A	8.6	High	Colon	73	male	white	Adenomas and Adenocarcinomas	27.102	II	M0	N0	T3	0	1706	NO	NO	NA	NO	NA	NO	NO	NO	TUMOR FREE	1.7	NO
TCGA	CM	5864	01A	8.6	High	Colon	60	male	white	Adenomas and Adenocarcinomas	31.7901	I	M0	N0	T2	0	457	NO	NO	NA	NO	NA	NO	NO	NO	TUMOR FREE	2.8	NO
TCGA	EI	6511	01A	8.6	High	Rectum	52	male	white	Adenomas and Adenocarcinomas	25.3444	III	M0	N1	T3	0	482	YES	NO	NA	NO	NA	YES	NO	YES	TUMOR FREE	14.9	YES
TCGA	DM	A1D0	01A	8.6	High	Colon	79	female	white	Adenomas and Adenocarcinomas	22.4914	II	M0	N0	T3	0	3974	NO	NO	NO	NA	Normal	NA	NO	NA	NA	NA	NA
TCGA	A6	5665	01A	8.5	High	Colon	84	female	white	Adenomas and Adenocarcinomas	36.8372	II	M0	N0	T3	0	671	YES	NO	YES	NO	Abnormal	YES	NO	NA	TUMOR FREE	19	NO
TCGA	DC	6155	01A	8.5	High	Rectosigmoid junction	31	female	white	Adenomas and Adenocarcinomas	20.8137	III	M0	N1	T2	0	425	NO	YES	NA	NO	NA	NO	NO	NO	TUMOR FREE	1.3	NO
TCGA	F5	6702	01A	8.5	High	Rectosigmoid junction	71	male	white	Adenomas and Adenocarcinomas	25.6896	IV	M1	N1	T3	0	869	NO	NO	NA	NO	NA	NO	NA	NO	WITH TUMOR	NA	NO
TCGA	D5	6923	01A	8.5	High	Colon	57	male	white	Adenomas and Adenocarcinomas	31.1705	I	M0	N0	T2	0	378	NO	NO	NO	NO	NA	NO	NO	NO	TUMOR FREE	1.8	NO
TCGA	NH	A6GC	06A	8.5	High	Colon	66	female	black or african american	Cystic, Mucinous and Serous Neoplasms	39.2545	IV	M1b	N1	T4	0	389	NO	NO	NO	NO	NA	NO	NA	NO	NA	NA	NO
TCGA	A6	4107	01A	8.4	High	Colon	57	female	white	Adenomas and Adenocarcinomas	38.708	III	M0	N1	T3	0	987	YES	NO	NO	NO	NA	NO	NO	NA	TUMOR FREE	1.6	NO
TCGA	A6	6140	01A	8.4	High	Colon	62	male	white	Adenomas and Adenocarcinomas	24.9582	II	M0	N0	T3	0	734	NO	NO	NA	NO	NA	NO	NO	NA	TUMOR FREE	1.3	NO
TCGA	EI	6509	01A	8.4	High	Rectum	53	male	white	Adenomas and Adenocarcinomas	25.8806	III	M0	N2	T3	0	517	YES	NO	NA	NO	NA	NO	NO	NO	WITH TUMOR	2.8	NO
TCGA	CM	6165	01A	8.3	High	Colon	74	male	white	Adenomas and Adenocarcinomas	28.1907	II	M0	N0	T3	0	488	NO	NO	NA	NO	NA	NO	NO	NO	TUMOR FREE	1.9	NO
TCGA	F4	6460	01A	8.3	High	Colon	51	female	white	Adenomas and Adenocarcinomas	25.8645	III	M0	N1	T3	1	972	NO	NO	NA	NO	NA	NO	NO	NO	WITH TUMOR	NA	NO
TCGA	DY	A0XA	01A	8.3	High	Rectosigmoid junction	57	female	white	Adenomas and Adenocarcinomas	25.3155	II	M0	N0	T3	0	3846	NO	NO	NO	NA	Normal	NA	NO	NA	NA	NA	NA
TCGA	A6	2682	01A	8.2	High	Colon	70	male	white	Adenomas and Adenocarcinomas	29.784	IV	M1	N1	T4	1	424	YES	YES	NA	YES	NA	NO	YES	NA	WITH TUMOR	2.8	NO
TCGA	A6	2686	01A	8.2	High	Colon	81	female	white	Adenomas and Adenocarcinomas	25.5567	II	M0	N0	T3	1	1126	NO	NO	NA	NO	NA	NO	NO	NA	TUMOR FREE	2.2	NO
TCGA	AZ	6598	01A	8.2	High	Colon	77	female	white	Adenomas and Adenocarcinomas		II	MX	N0	T3	1	1503	NO	NO	NA	NA	NA	NA	NA	NO	TUMOR FREE	7.5	NO
TCGA	EI	7002	01A	8.2	High	Rectum	58	male	white	Adenomas and Adenocarcinomas	27.1731	IV	M1	N2	T3	0	364	YES	NO	NA	NO	NA	NO	NO	NA	TUMOR FREE	140	NO
TCGA	A6	A566	01A	8.2	High	Colon	55	female	black or african american	Cystic, Mucinous and Serous Neoplasms	25.8203	III	M0	N1	T4	1	758	YES	NA	NA	NA	NA	NO	NO	NA	WITH TUMOR	NA	NO
TCGA	AM	5820	01A	8.1	High	Colon	59	female	white	Adenomas and Adenocarcinomas	36.4366	IV	M1	N2	T4	0	14	YES	NO	NO	NO	NA	NO	NO	NO	NA	176.1	NA
TCGA	F4	6569	01A	8.1	High	Colon	60	male	white	Adenomas and Adenocarcinomas	18.5185	I	M0	N0	T2	0	1087	NO	NO	NA	NO	NA	NA	NA	NO	TUMOR FREE	NA	NO
TCGA	D5	6930	01A	8.1	High	Colon	67	male	white	Cystic, Mucinous and Serous Neoplasms	26.5832	II	M0	N0	T3	0	406	NO	NO	NA	NO	NA	YES	NO	YES	NA	3	NO
TCGA	D5	7000	01A	8.1	High	Colon	79	female	white	Cystic, Mucinous and Serous Neoplasms	25.2994	I	M0	N0	T2	0	312	NO	NO	NO	NO	NA	NO	NO	NO	TUMOR FREE	2.4	NO
TCGA	QL	A97D	01A	8.1	High	Colon	84	female	black or african american	Adenomas and Adenocarcinomas		I	MX	N0	T2	0	666	NA	NA	NA	NA	NA	NA	NA	NA	TUMOR FREE	NA	NO
TCGA	G4	6299	01A	8	High	Colon	69	male	white	Adenomas and Adenocarcinomas	52.071	III	M0	N2	T3	0	2268	YES	YES	NA	NO	NA	NO	NO	NO	TUMOR FREE	NA	NO
TCGA	EI	6512	01A	8	High	Rectum	64	female	white	Adenomas and Adenocarcinomas	21.1073	III	M0	N1	T3	0	538	NO	NO	NA	NO	NA	NO	NO	NO	TUMOR FREE	1	NO
TCGA	AZ	6606	01A	8	High	Colon	81	male	white	Adenomas and Adenocarcinomas		IV	M1	N2	T4	1	357	YES	YES	NA	NA	NA	NA	NA	YES	WITH TUMOR	10.6	NO
TCGA	A6	6650	01A	8	High	Colon	69	female	black or african american	Adenomas and Adenocarcinomas	35.8186	II	M0	N0	T3	0	627	NO	NO	NA	NO	NA	NO	NO	NA	TUMOR FREE	2.9	NO
TCGA	CK	6751	01A	8	High	Colon	88	female	white	Cystic, Mucinous and Serous Neoplasms		I	MX	N0	T2	0	3780	NO	NO	NA	NO	NA	NO	NO	NO	TUMOR FREE	1.3	NO
TCGA	EI	6883	01A	8	High	Rectum	63	male	white	Adenomas and Adenocarcinomas	22.5309	II	M0	N0	T3	0	350	NO	NO	NO	NO	NA	NO	NO	NO	TUMOR FREE	1.6	NO
TCGA	D5	6898	01A	8	High	Colon	51	female	white	Adenomas and Adenocarcinomas	37.1802	I	M0	N0	T2	0	229	NO	NO	NO	NO	NA	NO	NO	NO	TUMOR FREE	8.1	NO
TCGA	DY	A1DC	01A	8	High	Rectosigmoid junction	72	female	white	Adenomas and Adenocarcinomas		II	M0	N0	T3	1	1258	NO	NO	NO	NA	Normal	NA	NA	NA	NA	NA	NA
TCGA	CK	4947	01B	7.9	High	Colon	46	female	white	Adenomas and Adenocarcinomas		III	M0	N1	T4	0	534	NA	NA	NA	NO	NA	NO	NO	NA	WITH TUMOR	2.5	NO
TCGA	CM	5349	01A	7.9	High	Colon	68	female	white	Adenomas and Adenocarcinomas	22.3537	II	M0	N0	T3	0	915	NO	NO	NA	NO	NA	NO	NO	NO	TUMOR FREE	3	NO
TCGA	F5	6464	01A	7.9	High	Rectosigmoid junction	77	female	white	Adenomas and Adenocarcinomas	26.8977	III	M0	N2	T4	1	303	NO	NO	NA	NO	NA	NO	NO	NO	NA	NA	NO
TCGA	DM	A0XD	01A	7.9	High	Colon	65	male	white	Adenomas and Adenocarcinomas	24.2188	II	M0	N0	T3	1	743	NO	NO	NO	NA	Normal	YES	NO	NA	NA	NA	NA
TCGA	A6	6649	01A	7.8	High	Colon	66	male	white	Adenomas and Adenocarcinomas	29.3629	III	M0	N1	T3	0	735	YES	YES	NA	YES	NA	YES	YES	YES	TUMOR FREE	10.9	NO
TCGA	CM	6677	01A	7.8	High	Colon	75	female	white	Adenomas and Adenocarcinomas	35.6771	II	M0	N0	T3	0	337	NO	NO	NA	NO	NA	YES	NO	NO	TUMOR FREE	3.7	NO
TCGA	A6	6780	01B	7.8	High	Colon	74	male	white	Cystic, Mucinous and Serous Neoplasms	22.7112	II	MX	N0	T3	0	612	NO	NO	NA	NO	NA	NO	YES	NA	TUMOR FREE	NA	NO
TCGA	DM	A1DB	01A	7.8	High	Colon	68	male	white	Adenomas and Adenocarcinomas	26.8923	II	M0	N0	T3	1	1348	NO	NO	NO	NA	Normal	NA	NA	NA	NA	NA	NA
TCGA	DM	A28C	01A	7.8	High	Colon	74	male	white	Adenomas and Adenocarcinomas	21.6049	II	M0	N0	T3	1	2475	NA	NA	NA	NA	NA	YES	NO	NA	NA	NA	NA
TCGA	DC	5337	01A	7.7	High	Rectosigmoid junction	69	male	white	Adenomas and Adenocarcinomas	25.4913	I	M0	N0	T1	0	792	NO	NO	NA	NO	NA	NO	NO	NO	NA	2	NO
TCGA	CM	5868	01A	7.7	High	Colon	59	female	white	Adenomas and Adenocarcinomas	34.1302	IV	M1a	N1	T4	0	518	YES	YES	NA	YES	Normal	NO	NO	YES	WITH TUMOR	93	NO
TCGA	F5	6465	01A	7.7	High	Rectosigmoid junction	64	female	white	Adenomas and Adenocarcinomas	21.4533	II	M0	N0	T3	0	1506	NO	NO	NA	NO	NA	NO	NA	NO	TUMOR FREE	NA	NO
TCGA	D5	6529	01A	7.7	High	Colon	69	male	white	Adenomas and Adenocarcinomas	34.22	II	M0	N0	T3	0	614	NO	NO	NA	NO	NA	NO	NA	YES	WITH TUMOR	8.4	NO
TCGA	D5	6929	01A	7.7	High	Colon	49	female	white	Adenomas and Adenocarcinomas	28.6851	IV	M1	N1	T3	0	408	YES	NO	NA	YES	NA	NO	NO	YES	TUMOR FREE	4.5	NO
TCGA	DM	A28G	01A	7.7	High	Colon	75	male	white	Adenomas and Adenocarcinomas	31.1419	II	M0	N0	T3	1	1849	NO	NO	NO	NA	Normal	YES	NO	NA	NA	NA	NA
TCGA	AY	A54L	01A	7.7	High	Colon	74	female	black or african american	Adenomas and Adenocarcinomas	22.9854	I	M0	N0	T2	0	525	NO	NO	NO	NO	NA	NO	NO	NO	WITH TUMOR	2.5	NO
TCGA	CM	4747	01A	7.6	High	Colon	47	male	white	Adenomas and Adenocarcinomas	21.701	IV	M1a	N1	T4	0	761	YES	NO	NA	YES	NA	YES	YES	YES	TUMOR FREE	2.6	NO
TCGA	A6	6138	01A	7.6	High	Colon	61	male	white	Adenomas and Adenocarcinomas	26.3869	I	M0	N0	T2	0	685	NO	NO	NA	NO	NA	YES	NO	NA	TUMOR FREE	2.8	NO
TCGA	EI	6884	01A	7.6	High	Rectum	71	male	white	Adenomas and Adenocarcinomas	26.4915	III	M0	N1	T3	0	328	NO	NO	NO	NO	NA	NO	NO	NO	TUMOR FREE	10.7	NO
TCGA	QG	A5Z2	01A	7.6	High	Colon	61	male	black or african american	Adenomas and Adenocarcinomas	29.114	I	M0	N0	T2	0	952	NO	NO	NA	NA	NA	YES	NO	NO	TUMOR FREE	1.52	NO
TCGA	5M	AAT6	01A	7.6	High	Colon	40	female	black or african american	Adenomas and Adenocarcinomas	37.761	IV	M1a	N2	T4	1	290	YES	YES	NA	NO	NA	YES	NO	YES	WITH TUMOR	2.61	NO
TCGA	AZ	4616	01A	7.5	High	Colon	82	female	white	Adenomas and Adenocarcinomas		IV	M1	N2	T3	1	156	YES	YES	NA	NA	NA	NA	NA	YES	WITH TUMOR	NA	NO
TCGA	CM	4743	01A	7.5	High	Colon	69	male	white	Adenomas and Adenocarcinomas	30.2628	II	M0	N0	T3	0	701	YES	NO	NA	NO	NA	NO	NO	NO	TUMOR FREE	4	NO
TCGA	A6	5662	01A	7.5	High	Colon	46	male	white	Adenomas and Adenocarcinomas	26.0494	IV	M1	N2	T3	0	718	YES	YES	NO	YES	NA	NO	NO	NA	WITH TUMOR	NA	NO
TCGA	G4	6295	01A	7.5	High	Colon	70	female	white	Adenomas and Adenocarcinomas		II	M0	N0	T3	0	254	NO	NO	NO	NO	NA	YES	NO	NO	TUMOR FREE	NA	NO
TCGA	G4	6310	01A	7.5	High	Colon	69	male	white	Adenomas and Adenocarcinomas	34.2477	III	M0	N1	T3	0	1935	NO	NO	NO	NO	NA	NO	NO	NO	TUMOR FREE	NA	YES
TCGA	AD	6899	01A	7.5	High	Colon	84	male	white	Cystic, Mucinous and Serous Neoplasms	20.2449	III	MX	N2	T4	1	176	YES	YES	NA	NO	NA	NO	NO	NA	TUMOR FREE	6.1	NO
TCGA	DM	A280	01A	7.5	High	Colon	70	female	white	Cystic, Mucinous and Serous Neoplasms	24.9199	II	M0	N0	T3	1	236	NO	NO	NO	NA	Normal	NO	NO	NA	NA	NA	NA
TCGA	DM	A285	01A	7.5	High	Colon	71	female	white	Cystic, Mucinous and Serous Neoplasms	23.5102	IV	M1	N2	T3	1	179	NA	NA	NO	NA	Normal	YES	YES	NA	NA	NA	NA
TCGA	F4	6808	01A	7.4	High	Colon	54	female	white	Adenomas and Adenocarcinomas	25.4028	I	M0	N0	T1	0	1024	NO	NO	NO	NO	NA	NO	NO	NO	TUMOR FREE	NA	NO
TCGA	DM	A28E	01A	7.4	High	Colon	72	female	white	Adenomas and Adenocarcinomas	33.3333	II	M0	N0	T3	0	3648	NO	NO	NA	NA	Normal	YES	NO	NA	NA	NA	NA
TCGA	AF	A56N	01A	7.4	High	Rectosigmoid junction	47	female	black or african american	Adenomas and Adenocarcinomas	28.6521	II	M0	N0	T3	0	360	NO	NO	NO	NO	NA	NO	NO	NA	TUMOR FREE	9.5	YES
TCGA	A6	3808	01A	7.3	High	Colon	73	male	white	Adenomas and Adenocarcinomas	25.9935	II	M0	N0	T3	0	1014	NO	NO	NO	NO	NA	NO	YES	NA	TUMOR FREE	NA	NO
TCGA	AZ	4682	01B	7.3	Low	Rectosigmoid junction	61	male	white	Adenomas and Adenocarcinomas		IV	M1	N0	T3	1	680	NO	NO	no	YES	NA	NA	NA	NA	WITH TUMOR	NA	NO
TCGA	A6	6141	01A	7.3	Low	Colon	31	male	black or african american	Adenomas and Adenocarcinomas	30.6205	II	M0	N0	T3	0	255	NO	NO	NO	NO	NA	NA	YES	NA	TUMOR FREE	5	NO
TCGA	CM	6161	01A	7.3	Low	Colon	36	female	white	Adenomas and Adenocarcinomas	21.6673	I	M0	N0	T2	0	457	NO	NO	NO	NO	NA	YES	NO	NO	TUMOR FREE	0.4	NO
TCGA	CM	6162	01A	7.3	Low	Colon	48	female	white	Cystic, Mucinous and Serous Neoplasms	37.2764	III	M0	N1	T3	0	365	YES	YES	NA	NO	NA	YES	NO	YES	TUMOR FREE	1.1	NO
TCGA	G4	6315	01A	7.3	Low	Colon	66	male	white	Adenomas and Adenocarcinomas	20.0692	IV	M1	N1	T3	0	1883	NO	NO	NA	NO	NA	YES	NO	YES	TUMOR FREE	43.4	NO
TCGA	G4	6321	01A	7.3	Low	Colon	60	female	white	Adenomas and Adenocarcinomas	31.4909	III	MX	N1	T2	0	672	NO	NO	YES	NO	NA	YES	YES	NO	TUMOR FREE	3.4	NO
TCGA	CI	6621	01A	7.3	Low	Rectum	63	male	white	Adenomas and Adenocarcinomas		III	MX	N1	T3	0	419	NA	NA	NA	NA	NA	NA	NA	NA	NA	NA	NA
TCGA	D5	6920	01A	7.3	Low	Colon	77	female	white	Adenomas and Adenocarcinomas	28.5156	II	M0	N0	T3	0	377	NO	NO	NA	NO	NA	NO	NO	NO	TUMOR FREE	1.7	NO
TCGA	AU	6004	01A	7.2	Low	Colon	69	female	white	Adenomas and Adenocarcinomas	21.4844	I	M0	N0	T2	0	824	NO	NO	NA	NO	NA	NO	YES	NO	NA	NA	NA
TCGA	DC	6157	01A	7.2	Low	Rectosigmoid junction	48	male	black or african american	Adenomas and Adenocarcinomas	33.8934	I	M0	N0	T2	0	1581	NO	NO	NA	NO	NA	NO	NO	NO	TUMOR FREE	2.2	NO
TCGA	CM	4751	01A	7.1	Low	Colon	62	male	white	Adenomas and Adenocarcinomas	34.3396	III	M0	N1	T3	0	822	YES	YES	NA	NO	NA	NO	NO	YES	TUMOR FREE	4.2	NO
TCGA	EI	6507	01A	7.1	Low	Rectum	60	male	white	Cystic, Mucinous and Serous Neoplasms	17.4329	II	M0	N0	T3	0	607	NO	NO	NA	NO	NA	NO	NO	NO	TUMOR FREE	10.7	NO
TCGA	EI	6508	01A	7.1	Low	Rectum	48	female	white	Adenomas and Adenocarcinomas	26.1066	III	M0	N1	T3	0	636	YES	NO	NA	NO	NA	NO	NA	YES	TUMOR FREE	0.6	NO
TCGA	D5	6534	01A	7.1	Low	Colon	62	female	white	Cystic, Mucinous and Serous Neoplasms	32.526	II	M0	N0	T3	0	1316	NO	NO	NA	NO	NA	YES	YES	YES	TUMOR FREE	0.9	NO
TCGA	CI	6622	01A	7.1	Low	Rectum	74	male	white	Adenomas and Adenocarcinomas		II	M0	N0	T4	0	1362	YES	YES	NA	NA	NA	NA	NA	YES	NA	NA	YES
TCGA	CM	6678	01A	7.1	Low	Colon	63	female	white	Adenomas and Adenocarcinomas	23.9361	IV	M1a	N1	T4	0	335	NO	NO	NA	YES	Normal	NO	NO	NO	TUMOR FREE	286.6	NO
TCGA	DY	A1H8	01A	7.1	Low	Rectum	77	female	white	Adenomas and Adenocarcinomas	15.625	III	M0	N1	T2	1	992	NA	NA	NA	NA	NA	NA	NA	NA	NA	NA	NA
TCGA	NH	A6GA	01A	7.1	Low	Colon	58	male	black or african american	Adenomas and Adenocarcinomas	34.7974	III	MX	N2	T4	1	302	YES	YES	NO	YES	NA	NO	NA	NO	WITH TUMOR	NA	NO
TCGA	AF	3400	01A	7	Low	Rectosigmoid junction	54	male	white	Cystic, Mucinous and Serous Neoplasms	27.0143	II	M0	N0	T3	0	1049	NO	NO	NO	NO	NA	YES	NO	NA	TUMOR FREE	2.8	YES
TCGA	CK	5912	01A	6.9	Low	Colon	81	male	white	Adenomas and Adenocarcinomas		I	MX	N0	T2	1	1493	NO	NO	NA	NO	NA	YES	NO	NO	NA	1.3	NO
TCGA	EI	6513	01A	6.9	Low	Rectum	59	male	white	Adenomas and Adenocarcinomas	25.4694	III	M0	N1	T3	0	497	NO	NO	NA	NO	NA	YES	NO	NO	TUMOR FREE	1	NO
TCGA	D5	6536	01A	6.9	Low	Colon	73	male	white	Adenomas and Adenocarcinomas	30.4867	II	M0	N0	T3	0	543	NO	NO	NA	NO	NA	NO	NA	YES	WITH TUMOR	NA	NO
TCGA	DC	6682	01A	6.9	Low	Rectosigmoid junction	57	male	white	Adenomas and Adenocarcinomas	50.9216	II	M0	N0	T3	0	762	NO	NO	NA	NO	NA	NO	NO	NO	TUMOR FREE	13.8	NO
TCGA	F4	6703	01A	6.9	Low	Colon	64	male	white	Adenomas and Adenocarcinomas	28.3937	II	M0	N0	T3	0	1456	NO	NO	NA	NO	NA	NO	NO	NO	TUMOR FREE	NA	NO
TCGA	CA	6717	01A	6.9	Low	Colon	57	male	asian	Cystic, Mucinous and Serous Neoplasms	20.5499	II	M0	N0	T3	0	388	NA	NA	NA	NA	NA	NA	NA	NA	TUMOR FREE	NA	NO
TCGA	CK	6747	01A	6.9	Low	Colon	87	female	white	Adenomas and Adenocarcinomas		II	MX	N0	T3	0	2523	NO	NO	NA	NO	NA	NO	NO	NO	TUMOR FREE	0.9	NO
TCGA	DM	A282	01A	6.9	Low	Colon	60	female	white	Cystic, Mucinous and Serous Neoplasms	18.7962	II	M0	N0	T3	0	4233	NO	NO	NO	NA	Normal	NO	NO	NA	NA	NA	NA
TCGA	AY	A71X	01A	6.9	Low	Colon	54	female	black or african american	Adenomas and Adenocarcinomas	48.3343	I	M0	N0	T2	0	588	NO	NO	NO	NO	NA	YES	NO	NO	TUMOR FREE	4.8	NO
TCGA	AF	3913	01A	6.8	Low	Rectosigmoid junction	60	male	black or african american	Adenomas and Adenocarcinomas	29.4753	IV	M1	N1	T3	1	316	YES	NO	NA	NO	NA	YES	NO	NA	WITH TUMOR	41.5	NO
TCGA	A6	5659	01A	6.8	Low	Colon	82	male	white	Adenomas and Adenocarcinomas	36.142	I	M0	N0	T2	0	926	NO	NO	NA	NO	NA	YES	NO	NA	TUMOR FREE	2.9	NO
TCGA	F4	6459	01A	6.8	Low	Colon	61	female	white	Adenomas and Adenocarcinomas	20.9572	III	M0	N2	T3	1	262	NO	NO	NA	NO	NA	NO	NO	NO	TUMOR FREE	NA	NO
TCGA	CM	6674	01A	6.8	Low	Colon	39	male	white	Adenomas and Adenocarcinomas	28.9361	II	M0	N0	T3	0	394	NO	NO	NA	NO	NA	NO	NO	NO	TUMOR FREE	1.1	NO
TCGA	F4	6805	01A	6.8	Low	Colon	58	female	white	Adenomas and Adenocarcinomas	22.8624	II	M0	N0	T3	0	1047	NO	NO	NA	NO	NA	NO	NO	NO	TUMOR FREE	NA	NO
TCGA	G5	6235	01A	6.7	Low	Rectosigmoid junction	72	male	white	Adenomas and Adenocarcinomas	27.1699	III	MX	N1	T3	0	1696	NO	NO	NA	NO	NA	NO	NO	NO	TUMOR FREE	1.7	NO
TCGA	A6	6651	01A	6.7	Low	Colon	55	female	white	Adenomas and Adenocarcinomas	33.4736	III	MX	N1	T3	0	662	YES	NO	NA	NO	NA	YES	YES	NA	TUMOR FREE	0.4	NO
TCGA	D5	6926	01A	6.7	Low	Colon	65	male	white	Adenomas and Adenocarcinomas	26.7755	III	M0	N1	T4	0	275	NO	NO	NO	NO	NA	NO	NO	NO	TUMOR FREE	2.2	YES
TCGA	DM	A28F	01A	6.7	Low	Colon	73	male	white	Adenomas and Adenocarcinomas	25.0574	III	M0	N1	T3	1	1094	NA	NA	NO	NA	Normal	YES	YES	NA	NA	NA	NA
TCGA	AY	6386	01A	6.6	Low	Colon	66	female	black or african american	Adenomas and Adenocarcinomas	36.738	III	M0	N1	T3	0	542	NO	NO	NO	NO	NA	YES	NO	NO	TUMOR FREE	1.3	NO
TCGA	AZ	6607	01A	6.6	Low	Colon	69	male	white	Adenomas and Adenocarcinomas		IV	M1	N2	T4	1	97	YES	YES	NA	NA	NA	NA	NA	YES	WITH TUMOR	22.6	NO
TCGA	A6	A5ZU	01A	6.6	Low	Colon	59	male	black or african american	Adenomas and Adenocarcinomas	34.2907	III	M0	N1	T3	0	293	YES	NO	NO	YES	NA	NO	NO	NA	TUMOR FREE	1.6	NO
TCGA	CA	5255	01A	6.5	Low	Colon	45	male	asian	Adenomas and Adenocarcinomas	18.9292	II	M0	N0	T3	0	376	NA	NA	NA	NA	NA	NA	NA	NA	TUMOR FREE	NA	YES
TCGA	A6	5660	01A	6.5	Low	Colon	73	male	black or african american	Adenomas and Adenocarcinomas	32.6644	III	M0	N2	T3	0	888	YES	YES	NA	YES	NA	YES	NO	NA	TUMOR FREE	0.8	NO
TCGA	AY	6196	01A	6.5	Low	Colon	47	male	white	Cystic, Mucinous and Serous Neoplasms		III	MX	N2	T3	0	6	YES	NO	NO	YES	NA	NO	NO	NO	TUMOR FREE	5.5	NA
TCGA	BM	6198	01A	6.5	Low	Rectum	73	male	white	Adenomas and Adenocarcinomas		III	MX	N1	T3	0	646	NO	NO	NA	NO	NA	NO	NO	NO	TUMOR FREE	81.3	YES
TCGA	G4	6302	01A	6.5	Low	Colon	90	female	white	Cystic, Mucinous and Serous Neoplasms	24.5095	II	M0	N0	T3	1	2047	YES	YES	NA	NO	NA	YES	NO	YES	TUMOR FREE	NA	NO
TCGA	F4	6570	01A	6.5	Low	Colon	78	female	white	Adenomas and Adenocarcinomas	23.3377	II	M0	N0	T3	1	188	NO	NO	NA	NO	NA	NA	NA	NO	TUMOR FREE	NA	NO
TCGA	F5	6571	01A	6.5	Low	Rectum	62	female	white	Adenomas and Adenocarcinomas	29.0318	II	M0	N0	T3	0	1288	NO	NO	NA	NO	NA	NO	NO	NO	TUMOR FREE	NA	NO
TCGA	G4	6586	01A	6.5	Low	Colon	73	female	white	Adenomas and Adenocarcinomas	27.3186	II	M0	N0	T3	0	1089	YES	YES	NA	NO	NA	NO	NO	NO	TUMOR FREE	NA	NO
TCGA	A6	6652	01A	6.5	Low	Colon	59	male	black or african american	Adenomas and Adenocarcinomas	40.2045	IV	M1	N0	T3	0	751	NO	NO	NO	NA	NA	YES	NA	NA	WITH TUMOR	4.8	NO
TCGA	CM	6679	01A	6.5	Low	Colon	58	male	white	Adenomas and Adenocarcinomas	33.6132	II	M0	N0	T3	0	306	NO	NO	NA	NO	NA	NO	NO	NO	TUMOR FREE	2.3	NO
TCGA	F4	6809	01A	6.5	Low	Colon	52	female	white	Adenomas and Adenocarcinomas	39.1111	IV	M1	N1	T3	1	403	NO	NO	NA	NO	NA	NO	NA	NO	WITH TUMOR	NA	NO
TCGA	DM	A0X9	01A	6.5	Low	Colon	71	female	white	Adenomas and Adenocarcinomas	29.7578	II	M0	N0	T3	0	3641	NO	NO	NO	NA	Normal	YES	NO	NA	NA	NA	NA
TCGA	5M	AATE	01A	6.5	Low	Colon	76	male	black or african american	Adenomas and Adenocarcinomas	24.0672	II	M0	N0	T3	0	1200	NO	NO	NA	NO	NA	NO	NO	NO	WITH TUMOR	2.91	NO
TCGA	AZ	4614	01A	6.4	Low	Colon	71	female	white	Adenomas and Adenocarcinomas		IV	M1	N1	T4	1	172	YES	YES	NA	NO	NA	NA	NA	NO	WITH TUMOR	49.7	NO
TCGA	AZ	5407	01A	6.4	Low	Colon	51	female	white	Adenomas and Adenocarcinomas		I	M0	N0	T1	0	2683	NO	NO	NO	NO	NA	NA	NA	NA	TUMOR FREE	NA	NO
TCGA	D5	5538	01A	6.4	Low	Colon	60	female	white	Adenomas and Adenocarcinomas	25.7117	III	M0	N1	T3	1	1661	NO	NO	NA	NO	NA	NO	NO	NO	TUMOR FREE	4.11	NO
TCGA	CM	5862	01A	6.4	Low	Colon	80	male	white	Adenomas and Adenocarcinomas	29.387	IV	M1a	N1	T3	1	153	NO	YES	NA	YES	Normal	YES	NO	NO	WITH TUMOR	10	NO
TCGA	CM	6167	01A	6.4	Low	Colon	57	female	black or african american	Adenomas and Adenocarcinomas	29.3962	III	M0	N2	T3	0	456	YES	YES	NA	YES	NA	YES	NO	YES	TUMOR FREE	5.5	NO
TCGA	CM	6168	01A	6.4	Low	Colon	84	female	black or african american	Adenomas and Adenocarcinomas	23.6476	II	M0	N0	T3	0	395	NO	YES	NA	NO	NA	NO	NO	NO	TUMOR FREE	7.8	NO
TCGA	AD	6888	01A	6.4	Low	Colon	73	male	white	Adenomas and Adenocarcinomas	28.6661	III	M0	N1	T3	1	472	YES	YES	NA	NO	NA	YES	YES	NO	WITH TUMOR	NA	NO
TCGA	AF	A56L	01A	6.4	Low	Rectosigmoid junction	48	female	black or african american	Adenomas and Adenocarcinomas	29.3897	III	M0	N2	T3	0	2007	YES	NO	NO	YES	NA	NO	NO	NA	TUMOR FREE	3.2	NO
TCGA	CA	5256	01A	6.3	Low	Colon	54	female	asian	Adenomas and Adenocarcinomas	20.3125	II	M0	N0	T3	0	379	NA	NA	NA	NO	NA	NA	NO	NA	TUMOR FREE	NA	NO
TCGA	G4	6303	01A	6.3	Low	Colon	54	female	white	Adenomas and Adenocarcinomas		IV	M1	N1	T3	1	2003	YES	YES	NA	YES	NA	YES	NO	NO	WITH TUMOR	3.8	NO
TCGA	F4	6461	01A	6.3	Low	Colon	41	female	white	Adenomas and Adenocarcinomas	24.9989	III	M0	N2	T4	1	338	NO	NO	NA	NO	NA	NO	NO	NO	WITH TUMOR	NA	NO
TCGA	CA	6719	01A	6.3	Low	Colon	77	male	asian	Adenomas and Adenocarcinomas	20.6193	II	M0	N0	T3	0	435	NA	NA	NA	NA	NA	NA	NA	NA	WITH TUMOR	NA	NO
TCGA	AZ	5403	01A	6.2	Low	Colon	43	male	white	Adenomas and Adenocarcinomas		II	MX	N0	T3	1	1910	NO	NO	NA	NO	NA	NA	NA	YES	WITH TUMOR	2.3	NO
TCGA	CM	6171	01A	6.2	Low	Colon	77	female	white	Adenomas and Adenocarcinomas	27.13	I	M0	N0	T2	0	427	NO	NO	NA	NO	NA	NO	NO	NO	TUMOR FREE	2	NO
TCGA	G4	6307	01A	6.2	Low	Colon	37	female	white	Adenomas and Adenocarcinomas	25.7657	III	M0	N1	T3	0	1674	YES	YES	NO	NO	NA	YES	NA	NO	TUMOR FREE	10.2	NO
TCGA	AZ	6608	01A	6.2	Low	Colon	55	female	white	Adenomas and Adenocarcinomas		III	M0	N1	T2	1	59	YES	YES	NA	NA	NA	NA	NA	NO	NA	3.7	NO
TCGA	AH	6903	01A	6.2	Low	Rectosigmoid junction	46	male	white	Cystic, Mucinous and Serous Neoplasms	22.3357	III	M0	N1	T3	0	592	NO	NO	NA	NO	NA	NO	NO	NO	TUMOR FREE	3.51	NO
TCGA	AF	6672	01A	6.1	Low	Rectosigmoid junction	43	male	white	Adenomas and Adenocarcinomas	31.4498	IV	MX	N2	T4	0	748	YES	NO	NO	YES	NA	NO	YES	NA	NA	9.6	YES
TCGA	AY	A8YK	01A	6.1	Low	Colon	44	male	black or african american	Adenomas and Adenocarcinomas	25.157	IV	M1	N2	T3	0	573	YES	YES	NO	NO	NA	NO	NO	NO	TUMOR FREE	5.9	NO
TCGA	CM	5344	01A	6	Low	Colon	39	female	white	Adenomas and Adenocarcinomas	26.6683	III	M0	N1	T3	0	670	YES	NO	NO	NO	NA	YES	YES	YES	TUMOR FREE	1.9	NO
TCGA	3L	AA1B	01A	6	Low	Colon	61	female	black or african american	Adenomas and Adenocarcinomas	21.1501	I	M0	N0	T2	0	475	NO	NO	NO	NO	NA	YES	YES	NO	NA	NA	NO
TCGA	AF	2687	01A	5.9	Low	Rectosigmoid junction	57	male	white	Adenomas and Adenocarcinomas	25.669	III	M0	N2	T3	0	1427	YES	NO	NA	YES	NA	NO	NO	NA	TUMOR FREE	5.3	YES
TCGA	AD	5900	01A	5.9	Low	Colon	67	male	white	Cystic, Mucinous and Serous Neoplasms		I	MX	N0	T2	0	370	NO	NA	NA	NA	NA	NO	NO	NO	NA	NA	NO
TCGA	CM	6164	01A	5.9	Low	Colon	46	female	white	Adenomas and Adenocarcinomas	26.2222	II	M0	N0	T3	0	883	NO	YES	NA	NO	NA	NO	NO	YES	TUMOR FREE	9.6	NO
TCGA	CM	6166	01A	5.9	Low	Colon	48	female	white	Adenomas and Adenocarcinomas	19.2234	I	M0	N0	T2	0	669	NO	NO	NA	NO	NA	NO	NO	NO	TUMOR FREE	1.3	NO
TCGA	CI	6619	01B	5.9	Low	Rectum	41	male	white	Adenomas and Adenocarcinomas		IV	M1	N1	T3	0	184	NA	NA	NA	NA	NA	NA	NA	NA	NA	52.7	NA
TCGA	A6	3809	01A	5.8	Low	Colon	71	female	white	Cystic, Mucinous and Serous Neoplasms	39.8828	II	M0	N0	T4	0	996	NO	NO	YES	NO	NA	YES	NO	NA	TUMOR FREE	NA	NO
TCGA	AZ	4615	01A	5.8	Low	Colon	84	male	white	Adenomas and Adenocarcinomas	29.0657	III	M0	N1	T3	0	1002	YES	YES	NA	NA	NA	NA	NA	NO	WITH TUMOR	2.1	NO
TCGA	D5	5539	01A	5.8	Low	Colon	60	male	white	Cystic, Mucinous and Serous Neoplasms	29.4076	III	M0	N1	T3	0	596	YES	NA	NA	NO	NA	NA	NA	NA	WITH TUMOR	5.1	NO
TCGA	AY	5543	01A	5.8	Low	Colon	65	female	black or african american	Adenomas and Adenocarcinomas		IV	M1	N1	T3	0	1004	NO	NO	NO	YES	NA	NO	NO	NO	TUMOR FREE	NA	NO
TCGA	EF	5831	01A	5.8	Low	Rectum	72	male	white	Adenomas and Adenocarcinomas	22.8624	II	M0	N0	T3	0	127	NA	NA	NA	NA	NA	NA	NA	NA	NA	NA	NO
TCGA	AD	6895	01A	5.8	Low	Colon	84	male	white	Adenomas and Adenocarcinomas	23.5294	III	M0	N1	T3	0	763	YES	YES	NA	NO	NA	NO	NA	NA	TUMOR FREE	NA	NO
TCGA	CM	4746	01A	5.7	Low	Colon	61	male	black or african american	Adenomas and Adenocarcinomas	32	I	M0	N0	T2	0	1126	NO	NO	NA	NO	NA	YES	YES	NO	TUMOR FREE	2.2	NO
TCGA	CM	6676	01A	5.7	Low	Colon	82	male	white	Adenomas and Adenocarcinomas	36.7309	I	M0	N0	T2	0	337	YES	NO	NA	NO	NA	NO	NO	NO	TUMOR FREE	4.5	NO
TCGA	F4	6807	01A	5.7	Low	Colon	51	female	white	Adenomas and Adenocarcinomas	20.6852	III	M0	N2	T3	0	1309	NO	NO	NO	NO	NA	NO	NO	NO	TUMOR FREE	NA	NO
TCGA	A6	A565	01A	5.7	Low	Colon	34	female	black or african american	Cystic, Mucinous and Serous Neoplasms	29.6444	III	MX	N2	T3	1	494	YES	YES	NA	YES	NA	YES	NO	NA	WITH TUMOR	71.5	NO
TCGA	QG	A5YV	01A	5.7	Low	Colon	64	female	black or african american	Adenomas and Adenocarcinomas	36.495	III	MX	N1	T4	0	1301	NO	NO	NA	NO	NA	NO	NO	NO	TUMOR FREE	15.04	NO
TCGA	DC	4749	01A	5.6	Low	Rectosigmoid junction	57	male	white	Adenomas and Adenocarcinomas	27.1839	I	M0	N0	T2	0	762	YES	YES	NA	NO	NA	NO	NO	NO	TUMOR FREE	1.3	NO
TCGA	CK	5913	01A	5.6	Low	Colon	58	female	white	Adenomas and Adenocarcinomas		II	MX	N0	T3	0	1561	NO	NO	YES	NO	Normal	NO	NO	NO	TUMOR FREE	0.6	NO
TCGA	DC	6158	01A	5.6	Low	Rectum	70	male	white	Adenomas and Adenocarcinomas	28.0078	I	M0	N0	T2	1	334	NO	YES	NA	NO	NA	NO	NO	YES	TUMOR FREE	1.7	NO
TCGA	A6	6653	01A	5.6	Low	Colon	82	male	white	Adenomas and Adenocarcinomas	29.4172	I	M0	N0	T2	0	742	NO	NO	YES	NO	Abnormal	NO	YES	NA	TUMOR FREE	2.5	NO
TCGA	A6	6654	01A	5.6	Low	Colon	65	female	white	Adenomas and Adenocarcinomas	32.5437	III	M0	N1	T3	0	726	YES	NO	NO	YES	NA	NA	YES	NA	TUMOR FREE	2.7	NO
TCGA	CA	6715	01A	5.6	Low	Colon	63	male	asian	Adenomas and Adenocarcinomas	22.8329	III	M0	N1	T3	0	383	NA	NA	NA	NA	NA	NA	NA	NA	TUMOR FREE	NA	NO
TCGA	F5	6813	01A	5.6	Low	Connective, subcutaneous and other soft tissues	70	male	white	Adenomas and Adenocarcinomas	28.075	III	M0	N2	T4	1	598	NO	NO	NA	NO	NA	NO	NO	NO	WITH TUMOR	NA	NO
TCGA	AH	6897	01A	5.6	Low	Rectosigmoid junction	48	male	white	Adenomas and Adenocarcinomas	26.5191	I	M0	N0	T2	0	804	NO	NO	NO	NO	NA	NO	NO	NO	TUMOR FREE	1.23	NO
TCGA	AF	2690	01A	5.5	Low	Rectum	76	female	white	Adenomas and Adenocarcinomas	21.2891	III	M0	N2	T3	1	524	YES	YES	NA	YES	NA	NO	NO	NA	TUMOR FREE	4.2	NO
TCGA	CM	5860	01A	5.5	Low	Colon	44	male	white	Adenomas and Adenocarcinomas	30.4009	II	M0	N0	T3	0	974	NO	YES	NA	NO	NA	NO	NO	YES	TUMOR FREE	3	NO
TCGA	CM	6170	01A	5.5	Low	Colon	73	female	white	Adenomas and Adenocarcinomas	40.8086	I	M0	N0	T2	0	457	NO	NO	NA	NO	NA	YES	YES	NO	TUMOR FREE	0.8	NO
TCGA	G4	6304	01A	5.5	Low	Colon	66	female	white	Adenomas and Adenocarcinomas		II	M0	N0	T4	0	1631	NO	NO	NA	NO	NA	NO	NO	NO	TUMOR FREE	4.4	NO
TCGA	G4	6311	01A	5.5	Low	Colon	80	male	white	Adenomas and Adenocarcinomas	23.2209	III	MX	N1	T3	0	1199	YES	YES	NO	NO	NA	NO	NO	YES	TUMOR FREE	0.9	NO
TCGA	DM	A28K	01A	5.5	Low	Colon	75	male	white	Cystic, Mucinous and Serous Neoplasms	25.763	II	M0	N0	T3	0	2988	NO	NO	NO	NA	NA	NA	NO	NA	NA	NA	NA
TCGA	D5	5541	01A	5.4	Low	Colon	63	male	white	Adenomas and Adenocarcinomas	28.0277	III	M0	N1	T3	0	1701	NO	NO	NA	NO	NA	NO	NO	NO	TUMOR FREE	2.3	NO
TCGA	AF	5654	01A	5.4	Low	Rectosigmoid junction	73	female	white	Adenomas and Adenocarcinomas	35.4821	I	M0	N0	T2	1	512	NO	NO	NO	NO	NA	NO	NO	NA	TUMOR FREE	NA	NO
TCGA	A6	5661	01A	5.4	Low	Colon	80	female	black or african american	Adenomas and Adenocarcinomas	23.91	II	M0	N0	T3	0	1020	NO	NO	YES	NO	NA	YES	YES	NA	TUMOR FREE	4.1	NO
TCGA	CL	5917	01A	5.4	Low	Rectosigmoid junction	71	female	white	Adenomas and Adenocarcinomas		III	MX	N2	T3	0	2376	YES	YES	NA	NO	NA	YES	YES	YES	TUMOR FREE	0.6	NO
TCGA	CM	6169	01A	5.4	Low	Colon	67	male	black or african american	Adenomas and Adenocarcinomas	35.2854	II	M0	N0	T3	0	396	YES	YES	NA	NO	NA	NO	NO	YES	TUMOR FREE	4.6	NO
TCGA	D5	6535	01A	5.4	Low	Colon	80	female	white	Adenomas and Adenocarcinomas	26.3702	III	MX	N1	T3	0	460	YES	NO	NA	YES	NA	YES	NO	YES	TUMOR FREE	66.7	NO
TCGA	DC	6683	01A	5.4	Low	Rectosigmoid junction	43	male	white	Adenomas and Adenocarcinomas	24.6648	III	M0	N1	T3	0	762	NO	YES	NA	NO	NA	NO	NO	YES	TUMOR FREE	11.1	NO
TCGA	CM	4750	01A	5.3	Low	Rectosigmoid junction	34	female	white	Adenomas and Adenocarcinomas	28.2335	III	M0	N1	T1	0	244	YES	NO	NA	NO	NA	YES	YES	NO	TUMOR FREE	1	NO
TCGA	G4	6294	01A	5.3	Low	Colon	75	male	white	Adenomas and Adenocarcinomas		IV	M1	N1	T3	1	858	NO	NO	NA	NO	NA	YES	NO	NO	WITH TUMOR	NA	NO
TCGA	AH	6643	01A	5.3	Low	Rectosigmoid junction	50	male	white	Adenomas and Adenocarcinomas	25.9053	III	M0	N2	T3	1	1314	NO	NO	NA	YES	NA	NO	NO	NO	WITH TUMOR	NA	NO
TCGA	AU	3779	01A	5.2	Low	Colon	80	female	white	Adenomas and Adenocarcinomas	33.6728	II	M0	N0	T3	0	441	NO	NO	NO	NO	NA	NO	YES	NO	NA	NA	NO
TCGA	DC	5869	01A	5.2	Low	Rectum	62	female	black or african american	Adenomas and Adenocarcinomas	21.5917	III	M0	N1	T3	0	943	NO	NO	NA	NO	NA	NO	NO	NO	TUMOR FREE	3.6	NO
TCGA	CL	5918	01A	5.2	Low	Rectum	90	female	white	Adenomas and Adenocarcinomas		II	MX	N0	T3	0	218	NO	NO	NA	NO	NA	NO	NO	NO	TUMOR FREE	2.2	NO
TCGA	AY	6197	01A	5.2	Low	Colon	60	male	white	Adenomas and Adenocarcinomas		II	MX	N0	T3	0	652	NO	NO	YES	NO	NA	NO	NO	NO	TUMOR FREE	NA	NO
TCGA	CM	6680	01A	5.2	Low	Colon	78	female	white	Adenomas and Adenocarcinomas	32.1778	III	M0	N2	T3	0	366	NO	NO	NA	NO	NA	NO	NO	NO	TUMOR FREE	1.4	NO
TCGA	A6	3807	01A	5.1	Low	Colon	53	female	white	Adenomas and Adenocarcinomas	41.2134	III	M0	N2	T3	0	1054	YES	YES	NO	NO	NA	YES	NO	NA	TUMOR FREE	45	NO
TCGA	DC	6154	01A	5.1	Low	Rectosigmoid junction	57	female	white	Adenomas and Adenocarcinomas	22.6337	IV	M1	N2	T4	0	365	YES	YES	NA	NO	NA	NO	NO	YES	TUMOR FREE	16.3	NO
TCGA	D5	6530	01A	5.1	Low	Colon	53	male	white	Adenomas and Adenocarcinomas	26.8687	I	M0	N0	T2	0	621	NO	NO	NA	NO	NA	NO	NA	YES	TUMOR FREE	3.5	NO
TCGA	A6	2677	01B	5	Low	Colon	68	female	white	Adenomas and Adenocarcinomas	21.5625	III	M0	N2	T3	1	740	YES	NO	NA	NO	NA	NO	NO	NA	TUMOR FREE	27.4	NO
TCGA	AY	4071	01A	5	Low	Colon	63	female	white	Adenomas and Adenocarcinomas		I	MX	N0	T1	1	29	NO	NO	NA	NO	NA	YES	YES	NO	TUMOR FREE	6	NO
TCGA	G4	6293	01A	5	Low	Colon	49	female	white	Adenomas and Adenocarcinomas	28.6667	III	M0	N1	T3	0	4051	NO	NO	YES	NO	NA	YES	NO	NO	TUMOR FREE	NA	NO
TCGA	G4	6314	01A	5	Low	Colon	76	female	white	Adenomas and Adenocarcinomas	33.4763	IV	M1	N2	T3	0	1093	YES	YES	NA	YES	Normal	YES	NO	NO	WITH TUMOR	NA	NO
TCGA	AZ	6599	01A	5	Low	Colon	72	male	white	Adenomas and Adenocarcinomas		I	MX	N0	T2	1	206	NO	NO	NA	NA	NA	NA	NA	NO	TUMOR FREE	NA	NO
TCGA	AZ	6605	01A	5	Low	Colon	77	male	white	Adenomas and Adenocarcinomas		III	M0	N1	T4	1	159	YES	YES	NA	NA	NA	NA	NA	NO	TUMOR FREE	2.5	NO
TCGA	DC	6156	01A	4.9	Low	Rectosigmoid junction	62	male	white	Adenomas and Adenocarcinomas	28.1143	IV	M1a	N2	T4	0	943	YES	YES	NA	NO	NA	NO	NO	YES	WITH TUMOR	129.7	NO
TCGA	F4	6704	01A	4.9	Low	Colon	60	male	american indian or alaska native	Cystic, Mucinous and Serous Neoplasms	48.6727	III	MX	N2	T3	0	47	NO	NO	NO	NA	NA	NO	NO	NA	NA	14.9	NA
TCGA	A6	2675	01A	4.8	Low	Colon	78	male	white	Adenomas and Adenocarcinomas	27.8516	II	MX	N0	T3	0	1321	NO	NO	NA	NO	NA	NO	NO	NA	TUMOR FREE	NA	NO
TCGA	CM	5861	01A	4.8	Low	Colon	63	female	white	Adenomas and Adenocarcinomas	45.3599	II	M0	N0	T3	0	457	NO	NO	NA	NO	NA	NO	NO	YES	TUMOR FREE	3.2	NO
TCGA	CM	5863	01A	4.8	Low	Colon	60	female	white	Cystic, Mucinous and Serous Neoplasms	45.9556	III	M0	N1	T3	0	457	NO	YES	NA	YES	NA	NO	NO	YES	TUMOR FREE	4.7	NO
TCGA	DM	A0XF	01A	4.8	Low	Colon	68	female	white	Adenomas and Adenocarcinomas	29.4118	III	M0	N2	T3	1	1162	NO	NO	NO	NA	NA	NA	NO	NA	NA	NA	NA
TCGA	4N	A93T	01A	4.8	Low	Colon	67	male	black or african american	Adenomas and Adenocarcinomas	47.6815	III	M0	N1	T4	0	146	NO	NO	NA	YES	NA	YES	NO	NO	WITH TUMOR	2	NO
TCGA	CA	5796	01A	4.7	Low	Colon	52	female	asian	Cystic, Mucinous and Serous Neoplasms		II	M0	N0	T3	0	377	NA	NA	NA	NA	NA	NA	NA	NA	TUMOR FREE	NA	NO
TCGA	QG	A5YX	01A	4.7	Low	Colon	61	female	black or african american	Adenomas and Adenocarcinomas	25.7782	II	MX	N0	T3	0	1003	NO	YES	NA	NO	NA	YES	NO	NO	TUMOR FREE	2.04	NO
TCGA	WS	AB45	01A	4.7	Low	Colon	52	female	black or african american	Cystic, Mucinous and Serous Neoplasms	14.7161	II	MX	N0	T3	0	2130	NO	NO	NA	NA	NA	NO	YES	NO	TUMOR FREE	NA	NO
TCGA	AY	4070	01A	4.6	Low	Colon	50	female	black or african american	Adenomas and Adenocarcinomas	39.375	III	M0	N2	T3	1	496	YES	YES	NA	NO	NA	NO	NO	YES	WITH TUMOR	67.5	NO
TCGA	CM	5341	01A	4.6	Low	Colon	82	female	white	Adenomas and Adenocarcinomas	38.1451	III	M0	N1	T2	0	884	YES	NO	NA	NO	NA	NO	YES	NO	TUMOR FREE	16.7	NO
TCGA	D5	6541	01A	4.6	Low	Colon	49	male	white	Adenomas and Adenocarcinomas	28.075	II	M0	N0	T3	0	474	NO	NO	NA	NO	NA	NA	NA	NO	TUMOR FREE	2	NO
TCGA	F4	6856	01A	4.6	Low	Colon	45	male	white	Cystic, Mucinous and Serous Neoplasms	23.8281	I	M0	N0	T2	0	1074	NO	NO	NA	NO	NA	NA	NA	NO	TUMOR FREE	NA	NO
TCGA	AF	A56K	01A	4.6	Low	Rectosigmoid junction	56	male	black or african american	Adenomas and Adenocarcinomas	43.6855	II	M0	N0	T3	0	2635	NO	NO	NA	NO	NA	NO	NO	NA	TUMOR FREE	0.5	NO
TCGA	QG	A5Z1	01A	4.6	Low	Rectosigmoid junction	71	male	black or african american	Adenomas and Adenocarcinomas		III	MX	N1	T3	1	256	YES	YES	NA	NA	NA	NO	NO	YES	NA	5.3	NO
TCGA	A6	5667	01A	4.5	Low	Colon	40	female	white	Adenomas and Adenocarcinomas	24.8163	III	MX	N1	T3	0	887	YES	NO	NO	NO	NA	NO	NA	NA	TUMOR FREE	36.3	NO
TCGA	A6	6137	01A	4.5	Low	Colon	55	male	white	Adenomas and Adenocarcinomas	28.6083	III	M0	N1	T3	0	824	NO	NO	NA	YES	NA	NO	YES	NA	TUMOR FREE	2.2	NO
TCGA	G4	6298	01A	4.5	Low	Colon	90	male	black or african american	Adenomas and Adenocarcinomas		III	MX	N1	T4	1	715	NO	NO	NA	NO	NA	NO	NO	YES	WITH TUMOR	NA	NO
TCGA	A6	6782	01A	4.5	Low	Colon	82	male	white	Adenomas and Adenocarcinomas	20.6367	II	MX	N0	T4	0	617	NO	NA	NA	YES	NA	NO	NO	YES	TUMOR FREE	2.7	NO
TCGA	DM	A1HB	01A	4.5	Low	Colon	75	male	white	Cystic, Mucinous and Serous Neoplasms	24.8016	III	M0	N1	T3	0	4126	NO	NO	YES	NA	Abnormal	NO	NO	NA	NA	NA	NA
TCGA	4T	AA8H	01A	4.5	Low	Colon	42	female	black or african american	Cystic, Mucinous and Serous Neoplasms	38.4325	II	MX	N0	T3	0	385	NO	NO	NO	NO	NA	NO	NO	NO	TUMOR FREE	NA	NO
TCGA	CA	6716	01A	4.4	Low	Colon	65	male	asian	Adenomas and Adenocarcinomas	20.7967	II	M0	N0	T3	0	371	NA	NA	NA	NA	NA	NA	NA	NA	TUMOR FREE	NA	NO
TCGA	CK	6748	01A	4.4	Low	Colon	45	female	white	Cystic, Mucinous and Serous Neoplasms		IV	M1	N1	T3	0	61	NO	NO	NO	NO	NA	NO	NO	NO	WITH TUMOR	400.26	NO
TCGA	CM	6172	01A	4.3	Low	Colon	70	female	white	Adenomas and Adenocarcinomas	34.0336	III	M0	N1	T3	0	335	NO	NO	NA	NO	NA	NO	NO	NO	TUMOR FREE	2.8	NO
TCGA	F5	6811	01A	4.3	Low	Rectosigmoid junction	72	female	white	Adenomas and Adenocarcinomas	32.3232	II	M0	N0	T3	0	979	NO	NO	NO	YES	NA	NA	NO	NA	TUMOR FREE	NA	NO
TCGA	CM	4752	01A	4.1	Low	Colon	58	male	black or african american	Adenomas and Adenocarcinomas	26.7981	II	M0	N0	T3	0	396	NO	NO	NA	NO	NA	NO	YES	YES	TUMOR FREE	2.2	NO
TCGA	A6	5666	01A	4.1	Low	Colon	78	male	white	Adenomas and Adenocarcinomas	25.6114	II	M0	N0	T4	0	995	NO	NO	NA	YES	NA	NO	NO	NA	TUMOR FREE	3.5	NO
TCGA	A6	2674	01B	4	Low	Colon	71	male	white	Cystic, Mucinous and Serous Neoplasms	27.8872	IV	M1	N2	T3	0	1331	NO	YES	NA	YES	NA	NO	NO	NA	TUMOR FREE	32.8	NO
TCGA	F5	6812	01A	4	Low	Connective, subcutaneous and other soft tissues	67	male	white	Adenomas and Adenocarcinomas	25.464	II	M0	N0	T3	0	1110	NO	NO	NA	NO	NA	NO	NO	NO	TUMOR FREE	NA	NO
TCGA	A6	3810	01B	3.9	Low	Colon	62	male	white	Adenomas and Adenocarcinomas	40.0653	II	M0	N0	T3	0	1111	NO	NO	NA	NO	NA	NO	YES	NA	TUMOR FREE	1.7	NO
TCGA	A6	6142	01A	3.8	Low	Colon	56	female	white	Adenomas and Adenocarcinomas	33.3254	IV	M1a	N1	T3	0	763	YES	YES	NO	NO	NA	NO	NA	NA	TUMOR FREE	5.4	NO
TCGA	CI	6624	01C	3.7	Low	Rectum	53	female	white	Adenomas and Adenocarcinomas		I	M0	N0	T2	0	1466	NO	NO	NA	NA	NA	NA	NA	NO	NA	7	NA
TCGA	AM	5821	01A	3.6	Low	Colon	68	female	white	Adenomas and Adenocarcinomas	31.0446	II	M0	N0	T3	0	28	NO	NO	NA	NO	NA	NA	YES	NO	NA	NA	NA
TCGA	CI	6623	01B	3.6	Low	Rectum	44	male	white	Adenomas and Adenocarcinomas		I	M0	N0	T1	0	1443	NO	NO	NA	NA	NA	NA	NA	NO	NA	5.9	NA
TCGA	CA	5254	01A	3.3	Low	Colon	42	female	asian	Adenomas and Adenocarcinomas	23.1911	II	M0	N0	T3	0	386	NA	NA	NA	NA	NA	NA	NA	NA	TUMOR FREE	NA	NO
TCGA	F4	6463	01A	3.3	Low	Colon	51	male	white	Cystic, Mucinous and Serous Neoplasms	20.4783	II	M0	N0	T3	0	1087	NO	NO	NA	NO	NA	NA	NA	NO	TUMOR FREE	NA	NO
TCGA	EI	6881	01A	3.3	Low	Rectum	60	male	white	Adenomas and Adenocarcinomas	27.7634	III	M0	N1	T3	0	499	NO	NO	NO	NO	NA	NO	NO	NO	TUMOR FREE	60.3	NO
TCGA	A6	2684	01A	3	Low	Colon	75	female	white	Adenomas and Adenocarcinomas	26.3841	I	M0	N0	T2	0	1127	NO	NO	NA	NO	NA	NO	YES	NA	TUMOR FREE	NA	NO
TCGA	NH	A50T	01A	2.9	Low	Colon	68	female	black or african american	Adenomas and Adenocarcinomas	28.7038	II	MX	N0	T3	0	553	NO	NO	NO	YES	NA	NO	NO	NO	TUMOR FREE	1.4	NO
TCGA	G4	6323	01A	2.7	Low	Colon	50	male	black or african american	Adenomas and Adenocarcinomas	30.0555	I	MX	N0	T1	0	419	NO	NO	NA	NO	NA	NO	NO	NO	TUMOR FREE	0.9	NO
TCGA	A6	6781	01A	2.5	Low	Colon	43	male	white	Cystic, Mucinous and Serous Neoplasms	24.1112	III	MX	N1	T4	0	598	YES	NO	NA	NO	NA	YES	NA	NA	TUMOR FREE	6.5	NO
TCGA	G4	6322	01A	2.3	Low	Colon	65	male	white	Cystic, Mucinous and Serous Neoplasms	27.4423	III	MX	N1	T3	0	792	YES	YES	NA	NO	NA	YES	NO	NO	WITH TUMOR	4.2	NO
TCGA	NH	A50U	01A	2.3	Low	Colon	42	male	black or african american	Cystic, Mucinous and Serous Neoplasms	29.6728	IV	M1a	N0	T4	1	334	NO	NO	NA	NO	NA	YES	NA	YES	NA	NA	NA
TCGA	A6	5656	01A	2.1	Low	Colon	74	male	white	Adenomas and Adenocarcinomas	23.9069	I	M0	N0	T2	0	1001	NO	NO	NA	NO	NA	NO	YES	NA	TUMOR FREE	5.1	NO
